# Supplementary material for: Endogenous TRIM5α Function Is Regulated by SUMOylation and Nuclear Sequestration for Efficient Innate Sensing in Dendritic Cells
Source: PubMed Central journal article supplement — Cell Rep. 2015 Dec 31;14(2):355–69. doi: 10.1016/j.celrep.2015.12.039 (PMC4713866; doi:10.1016/j.celrep.2015.12.039), 2015-12-31
Supplement: mmc2.pdf [file mmc2.pdf]

# Endogenous TRIM5 $\alpha$ Function Is Regulated by SUMOylation and Nuclear Sequestration for Efficient Innate Sensing in Dendritic Cells

## Graphical Abstract

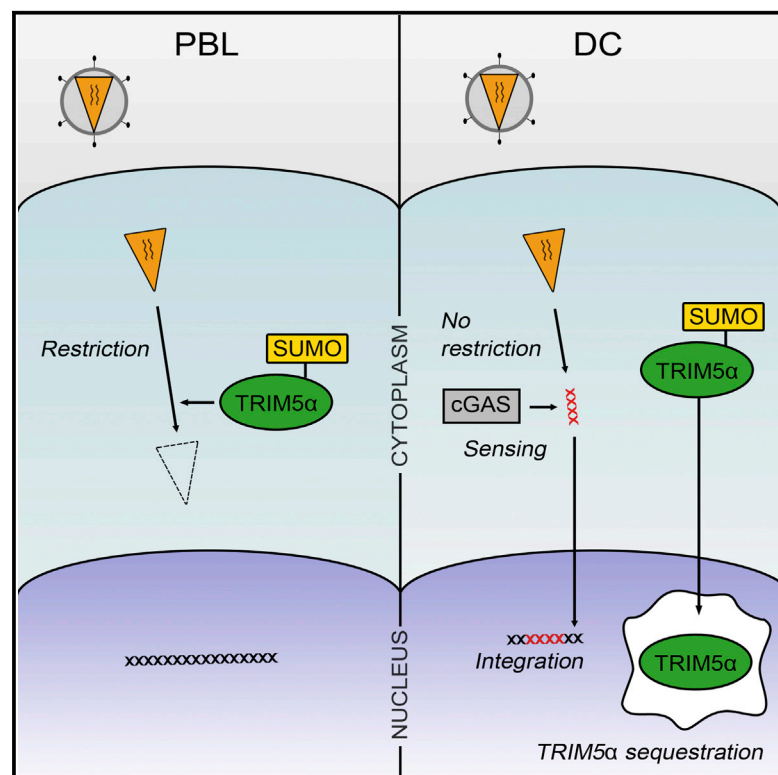

## Authors

Débora M. Portilho, Juliette Fernandez, Mathieu Ringiard, ..., Frank Kirchhoff, Sébastien Nisole, Nathalie J. Arhel

## Correspondence

nathalie.arhel@inserm.fr

## In Brief

Retroviruses can be efficiently blocked by a cellular restriction factor called TRIM5 $\alpha$ . Intriguingly, TRIM5 $\alpha$  is inactive in dendritic cells (DCs). Portilho et al. show that in DCs TRIM5 $\alpha$  is sequestered in the nucleus in a SUMOylation-dependent manner, favoring innate sensing of retroviruses in the cytoplasm by cGAS and thus an antiviral response.

## Highlights

- Primate dendritic cells (DCs) lack efficient TRIM5 $\alpha$ -mediated retroviral restriction
- In DCs TRIM5 $\alpha$  is sequestered in the nucleus in a SUMOylation-dependent manner
- TRIM5 $\alpha$  nuclear sequestration allows DC sensing of retroviral DNA by cGAS

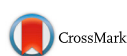

# Endogenous TRIM5 $\alpha$ Function Is Regulated by SUMOylation and Nuclear Sequestration for Efficient Innate Sensing in Dendritic Cells

Débora M. Portilho,<sup>1,7</sup> Juliette Fernandez,<sup>1,7</sup> Mathieu Ringiard,<sup>2</sup> Anthony K. Machado,<sup>1</sup> Aude Boulay,<sup>1</sup> Martha Mayer,<sup>3</sup> Michaela Müller-Trutwin,<sup>4</sup> Anne-Sophie Beignon,<sup>5</sup> Frank Kirchhoff,<sup>3</sup> Sébastien Nisole,<sup>6</sup> and Nathalie J. Arhel<sup>1,\*</sup>

<sup>1</sup>INSERM U941, University Institute of Hematology, Saint-Louis Hospital, 75010 Paris, France

<sup>2</sup>URA3015, Institut Pasteur, 75015 Paris, France

<sup>3</sup>Institute of Molecular Virology, Ulm University Medical Center, 89081 Ulm, Germany

<sup>4</sup>Institut Pasteur, Unité HIV, Inflammation et Persistance, 75015 Paris, France

<sup>5</sup>CEA-iMETI/Division of Immuno-Virology, Université Paris Sud, INSERM U1184, 92260 Fontenay-aux-Roses, France

<sup>6</sup>INSERM UMR-S 1124, Université Paris Descartes, 75006 Paris, France

<sup>7</sup>Co-first author

\*Correspondence: [nathalie.arhel@inserm.fr](mailto:nathalie.arhel@inserm.fr)

<http://dx.doi.org/10.1016/j.celrep.2015.12.039>

This is an open access article under the CC BY-NC-ND license (<http://creativecommons.org/licenses/by-nc-nd/4.0/>).

## SUMMARY

During retroviral infection, viral capsids are subject to restriction by the cellular factor TRIM5 $\alpha$ . Here, we show that dendritic cells (DCs) derived from human and non-human primate species lack efficient TRIM5 $\alpha$ -mediated retroviral restriction. In DCs, endogenous TRIM5 $\alpha$  accumulates in nuclear bodies (NB) that partly co-localize with Cajal bodies in a SUMOylation-dependent manner. Nuclear sequestration of TRIM5 $\alpha$  allowed potent induction of type I interferon (IFN) responses during infection, mediated by sensing of reverse transcribed DNA by cGAS. Overexpression of TRIM5 $\alpha$  or treatment with the SUMOylation inhibitor ginkgolic acid (GA) resulted in enforced cytoplasmic TRIM5 $\alpha$  expression and restored efficient viral restriction but abrogated type I IFN production following infection. Our results suggest that there is an evolutionary trade-off specific to DCs in which restriction is minimized to maximize sensing. TRIM5 $\alpha$  regulation via SUMOylation-dependent nuclear sequestration adds to our understanding of how restriction factors are regulated.

## INTRODUCTION

After entry in target cells, retroviral capsids are subject to host restriction by the “alpha” spliced variant of tripartite motif protein 5 (TRIM5 $\alpha$ ) (Stremmlau et al., 2004). Restriction operates by direct recognition of the viral capsid in the cytoplasm, leading to a premature and accelerated uncoating and to abortive infection (Stremmlau et al., 2006). TRIM5 $\alpha$  proteins restrict retroviruses in a species-specific manner and thus constitute an effective barrier to cross-species transmissions of retroviruses. For instance, rhesus macaque (RM) TRIM5 $\alpha$  restricts

HIV-1, SIVagm, and N-MLV, but not SIVmac, whereas human TRIM5 $\alpha$  can block N-MLV and equine infectious anemia virus (EIAV), but is less effective against HIV-1 (Bieniasz, 2004; Song et al., 2005).

TRIM5 $\alpha$ -mediated restriction was identified in a number of macaque primary cells and cell lines (LLC-MK2, FRhK-4, FrHL-2, Rh.F and RM primary lung fibroblasts) (Besnier et al., 2002; Cowan et al., 2002; Münk et al., 2002; Stremmlau et al., 2004; Yap et al., 2004). However, while RM T lymphocytes efficiently block HIV-1 infection, we have previously shown that RM dendritic cells (DCs) lack TRIM5 $\alpha$ -mediated restriction and are permissive to HIV-1 infection (Arhel et al., 2008). We further showed that TRIM5 $\alpha$  RNA levels are normal in DCs and there is no detectable increase in the competitive inhibitor TRIM5 $\gamma$ . These findings suggest that the endogenous TRIM5 $\alpha$  protein is likely to be dysfunctional, a possibility supported by the finding that the overexpression of RM TRIM5 $\alpha$  in DCs restores restriction (Arhel et al., 2008).

Recent work proposed that TRIM5 $\alpha$  restriction may be modulated by the small ubiquitin-related modifier (SUMO) machinery (Arriagada et al., 2011; Dutrieux et al., 2015; Lukic et al., 2013; Nepveu-Traversy and Berthou, 2014). The human SUMO family consists of four members, SUMO1 to SUMO4. SUMO can either be directly conjugated to protein substrates by covalent addition of a SUMO moiety to a lysine residue within the  $\Psi$ KxE consensus sequence (where  $\Psi$  is a large hydrophobic residue and x any amino acid) (Sampson et al., 2001), or can interact non-covalently with target proteins through SUMO-interaction motifs (SIMs) (Hecker et al., 2006; Minty et al., 2000). Many viral proteins are SUMOylated or influence the SUMOylation of cellular proteins, and the infection of some viruses is dependent on pathways that are regulated by SUMOylation (Everett et al., 2013). SUMO1 overexpression enhances restriction of N-MLV and HIV-1 by human and RM TRIM5 $\alpha$ , respectively, while knock-down of SUMO1 or the Ubc9 E2 SUMO-conjugating enzyme reduces HIV-1 restriction by RM TRIM5 $\alpha$  (Arriagada et al., 2011; Dutrieux et al., 2015; Lukic et al., 2013). We recently showed

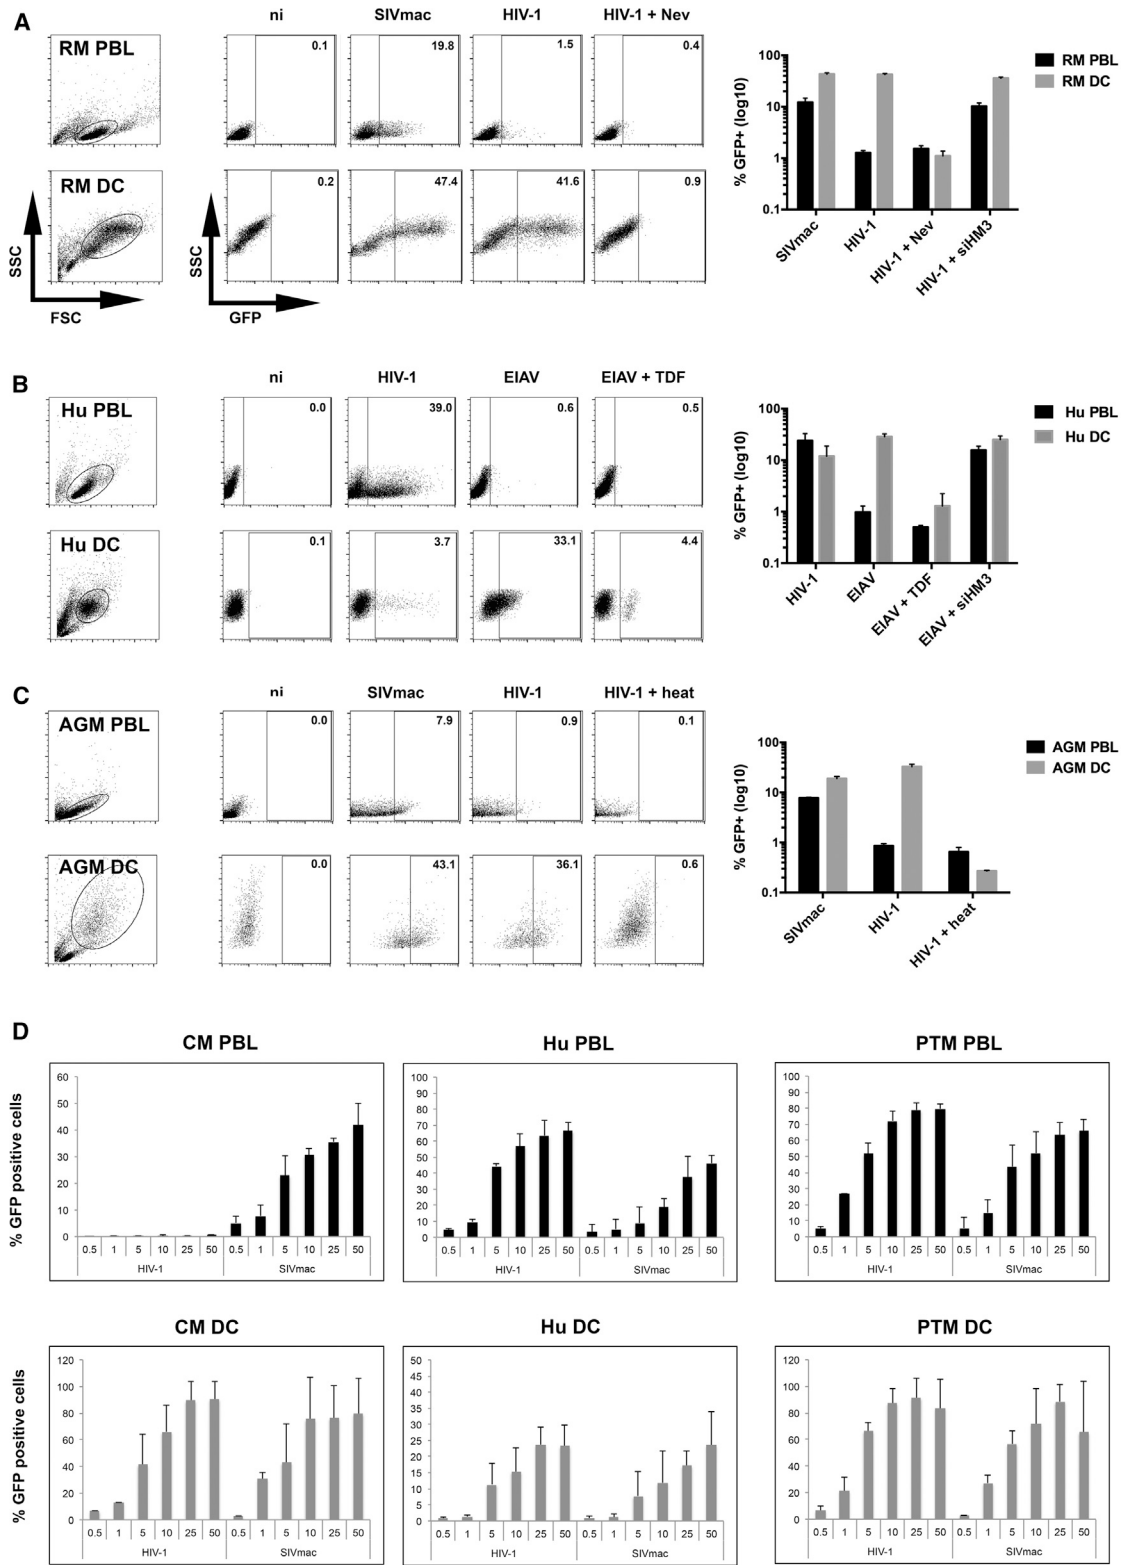

**Figure 1. Lack of TRIM5 $\alpha$ -Mediated Restriction in Human and Non-human Primate Myeloid DCs**

(A–C) PBLs and DCs from (A) rhesus macaque, (B) human, and (C) African green monkey were transduced at MOI 5,  $\pm$  nevirapine (5  $\mu$ M), tenofovir disoproxil fumarate (TDF, 100  $\mu$ M), heat-treated, or treated with a specific siRNA against human and RM TRIM5 $\alpha$  (siHM3). Representative flow cytometry charts at 3 dpt are

(legend continued on next page)

that human and RM TRIM5 $\alpha$  are substrates for SUMO modification *in vitro* and *in cellulo*, and the putative SUMO conjugation consensus site at residue K10 is the main site for SUMO modification (Dutrieux et al., 2015). However, although K10R point mutants abrogated SUMOylation at this position, TRIM5 $\alpha$  antiviral activity was not impaired, arguing that non-covalent interaction with SUMO or SUMO-modified proteins rather than direct SUMOylation of TRIM5 $\alpha$  might be responsible for TRIM5 $\alpha$  restriction. Three SIMs that are able to bind SUMO1 were identified within the PRYSPRY domain necessary for capsid recognition and are shown to contribute to the ability of human TRIM5 $\alpha$  to restrict N-MLV infection (Arriagada et al., 2011; Lukic et al., 2013). Given that the MLV capsid (CA) was shown to undergo SUMO1 conjugation (Yueh et al., 2006), this suggests that human TRIM5 $\alpha$  might interact with SUMOylated MLV CA via SIMs within the PRYSPRY domain. However, two of the three SIMs in RM TRIM5 $\alpha$  are reportedly buried internally within the PRYSPRY domain and are therefore unlikely to mediate SUMO-SIM interactions (Brandariz-Nuñez et al., 2013).

The aim of this study was to define the mechanism responsible for the lack of TRIM5 $\alpha$  function in DCs and to clarify the effects on viral immune sensing by these potent accessory cells. We first show that absence of TRIM5 $\alpha$  restriction is observed in DCs from all tested human and non-human primates, pointing to a common trait of humans and old world monkeys. Endogenous TRIM5 $\alpha$  in DCs was found to be sequestered in the nucleus within NB that co-localize with Cajal bodies, a phenotype that was reversed upon treatment with ginkgolic acid (GA), an inhibitor of the E1 SUMO activating enzyme. Finally, induced cytoplasmic localization of TRIM5 $\alpha$  in DCs by its overexpression or by GA treatment restored restriction and abrogated type I IFN production following retroviral infection. Together, our data show that TRIM5 $\alpha$  is unable to restrict incoming retroviruses in DCs because it is absent from the cytoplasm. The resulting unhampered retroviral infection triggers innate sensing by host cell sensors and robust type I IFN production, suggesting that the lack of TRIM5 $\alpha$  restriction in DCs is an anti-viral mechanism that has evolved to promote immune responses necessary to control viral spread in the infected host.

## RESULTS

### Human and Non-human Primate DCs Lack TRIM5 $\alpha$ -Mediated Restriction

We previously showed that RM (*Macaca mulatta*) DCs, contrary to all other tested RM cells (Arhel et al., 2008; Besnier et al., 2002; Cowan et al., 2002; Münk et al., 2002; Stremlau et al., 2004; Yap et al., 2004), are permissive to HIV-1 infection, indicating an absence of functional TRIM5 $\alpha$ -mediated restriction in this cell type (Arhel et al., 2008). Given that immature DCs are highly phagocytic, we carried out retroviral transductions in the presence of a reverse transcription inhibitor to ascertain whether up-

take might be the result of non-specific pseudo-transduction. RM peripheral blood lymphocytes (PBLs) and monocyte-derived DCs were characterized with phenotypic markers (Figure S1A) and transduced with either SIVmac (not restricted) or HIV-1 (restricted). RM PBLs were not permissive to HIV-1, and treatment with a specific TRIM5 $\alpha$  small interfering RNA (siRNA) restored transduction, confirming that TRIM5 $\alpha$  is responsible for restriction in these cells (Figure 1A). In contrast, RM DCs were equally permissive to SIVmac and HIV-1, indicating an absence of efficient TRIM5 $\alpha$  restriction in DCs. HIV-1 infection of RM DCs was also observed using R5-tropic HIV-1 virus (Figure S1B). Treatment with nevirapine (Nev) reduced HIV-1 infection to levels similar to those seen in uninfected samples, validating that HIV-1 infection of RM DCs resulted in bona fide productive transduction events (Figure 1A).

To determine whether the absence of TRIM5 $\alpha$  restriction in DCs is a common phenomenon, human PBLs and DCs were transduced with either HIV-1 (not restricted) or EIAV (restricted) vectors (Figure 1B). DCs were ~2-fold less permissive than PBLs to HIV-1 infection (12.0%  $\pm$  6.9% versus 24.1%  $\pm$  8.7% infected cells, n = 4), as reported in the literature (Berger et al., 2011; Laguette et al., 2011). As expected, human PBLs were refractory to EIAV infection (0.9%  $\pm$  0.3% infected cells) and knockdown of TRIM5 $\alpha$  in these cells restored transduction, confirming that restriction is mediated by TRIM5 $\alpha$ . Human DCs, on the other hand, were efficiently transduced with EIAV (28.7%  $\pm$  3.8%), pointing to absence of restriction. Infection in the presence of tenofovir (TDF), which blocks both HIV-1 and EIAV reverse transcription (Figure S1C), reduced infection to levels comparable to uninfected samples (0.5% and 1.6% for PBLs and DCs, respectively, Figure 1B).

Similarly, African green monkeys (AGM, *sabaeus* species) PBLs were found to be non-permissive to HIV-1 transduction with <1% GFP-positive PBLs and weakly permissive to SIVmac, with ~8% transduction. In contrast, >30% *Chlorocebus sabaeus* DCs were efficiently transduced by HIV-1 and ~20% by SIVmac, indicating an absence of efficient TRIM5 $\alpha$  restriction in AGM DCs (Figure 1C).

Since restriction by TRIM5 $\alpha$  is saturable, the addition of sufficient quantities of virus-like particles overcomes its activity. To ensure that the transduction of DCs did not saturate TRIM5 $\alpha$  activity, we performed dose-response studies. PBLs and DCs from cynomolgus macaques (CM) (*Macaca fascicularis*), whose TRIM5 $\alpha$  restricts HIV-1 but not SIVmac, were infected with increasing MOI from 0.5 to 25. Cells from pigtailed macaques (PTM) (*Macaca nemestrina*), which, in the place of TRIM5 $\alpha$ , express a TRIMCyp fusion protein that cannot bind to or restrict HIV-1 (Brennan et al., 2008; Liao et al., 2007; Newman et al., 2008; Virgen et al., 2008), and cells from human donors were included as controls. PBLs from all three species were permissive to SIVmac transduction (Figure 1D). However, as expected, CM PBLs were poorly permissive to HIV-1 transduction

shown left, while graphs show the mean of three independent experiments with log<sub>10</sub> scale  $\pm$  SD using different primate donors (RM, n = 2; human, n = 4; AGM, n = 2) and different vector batches.

(D) PBLs and DCs from cynomolgus macaque (n = 2), human (n = 3) and pigtailed macaque (n = 3) were transduced with increasing MOI ranging from 0.5 to 50. Graphs show GFP expression 3 dpt (3 independent experiments  $\pm$  SD).

See also Figure S1.

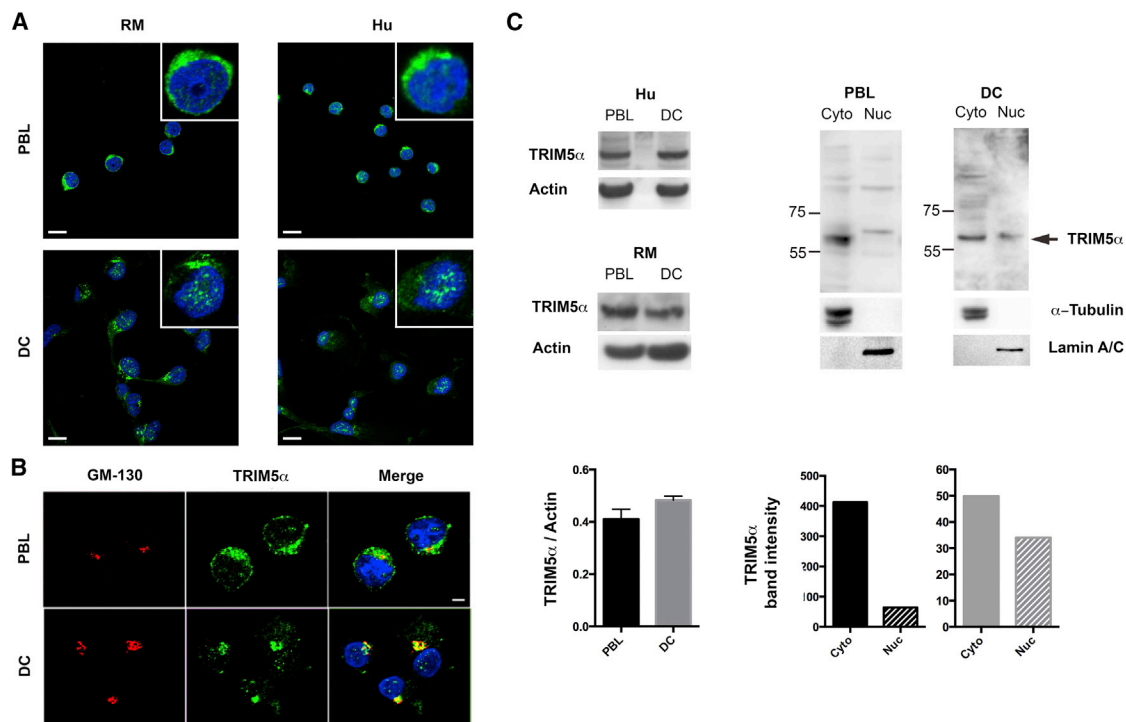

**Figure 2. Endogenous TRIM5 $\alpha$  Is Cytoplasmic in PBLs and Forms Nuclear Bodies in Human and RM DCs**

(A) Endogenous TRIM5 $\alpha$  localization in human and RM PBLs and DCs. Insets show higher magnification images for each sample. Scale bars represent 10  $\mu$ m. (B) TRIM5 $\alpha$  (green) and Golgi marker GM-130 (red) co-localization in human PBLs and DCs. Scale bar represents 5  $\mu$ m. (C) TRIM5 $\alpha$  protein levels from whole cell extracts (RM and human) and following fractionation (human). Left-hand graph shows quantification from six different samples (ImageJ). See also Figure S2.

compared with PTM and human PBLs, even at high MOI, indicating efficient restriction of HIV-1. In contrast, CM DCs were as permissive to HIV-1 infection as PTM DCs and more permissive than human DCs, even at a MOI as low as 0.5 (Figure 1D).

Thus, our results demonstrate a lack of efficient TRIM5 $\alpha$ -mediated restriction in DCs from rhesus, cynomolgus, and pigtailed macaques, in humans, and in African green monkeys, suggesting that this phenomenon is a widespread trait of primate DCs. Infection of DCs was dependent on efficient reverse transcription and was also observed at low MOI, indicating that it was not a result of pseudotransduction (non-specific uptake of GFP protein) or saturation of the TRIM5 $\alpha$  restriction factor.

#### Endogenous TRIM5 $\alpha$ Localizes to Nuclear Bodies in DCs

TRIM5 $\alpha$  proteins from humans and RM have been reported to shuttle between the cytoplasm and the nucleus (Diaz-Griffero et al., 2011). We therefore hypothesized that TRIM5 $\alpha$  might be mislocalized in DCs and thus unable to interact with incoming cytoplasmic retroviral cores. To test this hypothesis, we used a rabbit polyclonal antibody raised against a C-terminal fragment of TRIM5 $\alpha$  (Zhang et al., 2008) to detect endogenous TRIM5 $\alpha$ . Reactivity against rhesus TRIM5 $\alpha$  (TRIM5 $\alpha_{rh}$ ) was previously established by western blotting (Zhang et al., 2008), and we confirmed that it also recognizes endogenous human TRIM5 $\alpha$  (TRIM5 $\alpha_{hu}$ ) (Figure S2A). Similarly to commercial antibodies,

the rabbit TRIM5 $\alpha$  antibody used for this study recognizes higher molecular weight bands that likely correspond to TRIM5 $\alpha$  multimers (Li et al., 2011; Nepveu-Traversy et al., 2009). Specific TRIM5 $\alpha$  knockdown was associated with a marked decrease in the TRIM5 $\alpha$  signal detected by immunofluorescence (Figure S2B). Conversely, transduction of MDTF cells that do not encode a TRIM5 ortholog (reviewed in Lee and KewalRamani, 2004) with TRIM5 $\alpha_{rh}$ -HA or TRIM5 $\alpha_{hu}$ -HA led to positive TRIM5 $\alpha$  labeling in HA-positive cells, while negative cells showed minimal background staining (Figure S2C).

PBLs and DCs from human and RM donors were labeled with the TRIM5 $\alpha$ -specific antibody to assess endogenous localization in these cells (Figure 2A). Whereas TRIM5 $\alpha$  localized mainly in the cytoplasm of PBLs, it aggregated within the nucleus of DC in structures reminiscent of NB, a phenotype that was not observed in PBLs. Although some cytoplasmic signal was also detected in DCs, the majority co-localized with the Golgi marker GM-130 (Figure 2B). Golgi-localized TRIM5 $\alpha$ , which may correspond to a step in TRIM5 $\alpha$  proteasome-independent degradation (Sastri and Campbell, 2011), was also observed in PBLs. In contrast, dense nuclear aggregates were never observed in PBLs. Whole-cell extracts revealed no difference in total levels of TRIM5 $\alpha$  between PBLs and DCs, but subcellular fractionation confirmed the differences in subcellular localization observed by microscopy (Figure 2C). Given that TRIM5 $\alpha$  restriction is

operational in PBLs but not DCs, we hypothesized that the accumulation of TRIM5 $\alpha$  in structures resembling NB in DCs might account for its lack of antiretroviral activity.

### DC Nuclear TRIM5 $\alpha$ Aggregates in Cajal Bodies but Not in PML-NB

Previous work showed that exogenously expressed TRIM5 $\alpha$  in HeLa cells can be induced to co-localize with PML-NB by blocking CRM1-dependent protein nuclear export with leptomycin B treatment (LMB) (Diaz-Griffero et al., 2011). We therefore tested whether nuclear TRIM5 $\alpha$  aggregates co-localize with PML-NB. In PBLs, TRIM5 $\alpha$  is mainly cytoplasmic and no co-localization with PML-NB was detected (Figure 3A). In DCs, TRIM5 $\alpha$  NB and PML-NB were both readily observed, but the signals did not overlap (Manders' coefficient of co-localization  $M < 0.1$ ). Treatment with IFN $\alpha$ , previously shown to enhance TRIM5 $\alpha$  and PML expression (Carthagena et al., 2008; Sakuma et al., 2007), increased the number and size of PML-NB, as previously described (Chelbi-Alix et al., 1995), but did not induce co-localization between TRIM5 $\alpha$  and PML-NB. LMB treatment, shown to trap TRIM5 $\alpha$  in the nucleus (Diaz-Griffero et al., 2011), induced diffuse nuclear accumulation of TRIM5 $\alpha$  in PBLs, but not co-localization with PML-NB.

Next, we tested for TRIM5 $\alpha$  co-localization with another nuclear body, Cajal bodies, using the marker p80 coilin to identify these subnuclear structures (Figure 3B). In DCs, TRIM5 $\alpha$  NB were found to partially co-localize with coilin ( $M \sim 0.3$ ), indicating that in DCs  $\sim 30\%$  of TRIM5 $\alpha$  might be trapped in Cajal bodies. This was observed both in human and RM DCs and was not further induced by LMB treatment (Figure 3B). To confirm the interaction of endogenous TRIM5 $\alpha$  with Cajal bodies, we performed a Duolink in situ proximity ligation assay (Figure 3C). In PBLs, signal detection was low ( $0.27 \pm 0.06$  spots/cell) indicating a lack of proximity between TRIM5 $\alpha$  and coilin. In DCs, however, signals of proximity were about seven times more frequent ( $1.86 \pm 0.35$  spots/cell). Given that the number of Cajal bodies detected in DCs is one to five per nucleus, this result is concordant with the co-localization of TRIM5 $\alpha$  with Cajal bodies.

### Mislocalization of TRIM5 $\alpha$ in DCs Accounts for Lack of Restriction

We previously showed that overexpression of TRIM5 $\alpha_{rh}$  in RM DCs restores efficient restriction of HIV-1 infection (Arhel et al., 2008). We therefore tested the effect of TRIM5 $\alpha$  overexpression on its localization. Human DCs were either labeled with TRIM5 $\alpha$  antibody to reveal endogenous protein, or transduced with a lentiviral vector coding for mRFP-TRIM5 $\alpha_{hu}$  fusion protein. While endogenous TRIM5 $\alpha$  formed nuclear aggregates in DCs, its overexpression resulted in its accumulation as dense cytoplasmic aggregates, characteristic of cytoplasmic bodies as previously reported (Stremlau et al., 2004) (Figure 4A). Control or TRIM5 $\alpha$ -overexpressing human DCs were challenged with EIAV and infection was assessed by flow cytometry at 48 hr post-infection (hpi) (Figure 4B). Forced cytoplasmic expression of TRIM5 $\alpha$  by overexpression restored restriction against EIAV in human DCs, suggesting that TRIM5 $\alpha$  nuclear localization in

DCs accounts for the lack of efficient restriction. To confirm this, TRIM5 $\alpha_{rh}$  was fused at its N terminus to the Cajal body targeting domain (CBD) of human coilin (Figure 4C). P4-CCR5 cells were transduced with TRIP-TRIM5 $\alpha_{rh}$  or TRIP-Coilin-TRIM5 $\alpha_{rh}$  and challenged with HIV-1. Infection was efficiently restricted by TRIM5 $\alpha$  but forced nuclear targeting abrogated restriction, confirming that mislocalization of TRIM5 $\alpha$  accounts for the lack of restriction.

### TRIM5 $\alpha$ Localizes to Cajal Bodies in a SUMOylation-Dependent Manner in DCs

Recent work showed that human and RM TRIM5 $\alpha$  are substrates for SUMO modification (Dutrieux et al., 2015), and that putative SIM domains in TRIM5 $\alpha$  may mediate interaction with SUMO-modified proteins (Arriagada et al., 2011). SUMO modification has been shown to modulate sub-nuclear localization and function of TRIM19/PML (Müller et al., 1998). We therefore examined whether SUMO modification might account for TRIM5 $\alpha$  accumulation in NB of DCs. Human PBLs and DCs were treated with 10 and 100  $\mu$ M GA for 24 hr and labeled for endogenous TRIM5 $\alpha$  and either PML or coilin. GA treatment did not induce TRIM5 $\alpha$  co-localization with PML in either cell type (Figure 4D). Similarly, no co-localization between TRIM5 $\alpha$  and coilin was detected in PBLs and this was not altered following GA treatment. In DCs, however, GA treatment led to a dose-dependent reduction of TRIM5 $\alpha$  co-localization with coilin, without reducing the number of Cajal bodies per cell. Pre-treatment with 10  $\mu$ M GA led to a 5-fold decrease in TRIM5 $\alpha$ /coilin co-localization, and co-localization was abolished following treatment with 100  $\mu$ M GA. Given the obtained Manders' coefficients, we estimate that approximately one-third of nuclear TRIM5 $\alpha$  is found associated with Cajal bodies in DCs and that this is dependent on SUMO modification. Localization of TRIM5 $\alpha$  in Golgi was not sensitive to GA treatment in either DCs or PBLs, indicating that it is unlikely to contribute to the SUMOylation-dependent functional inactivation of TRIM5 $\alpha$  in DCs.

Given that inhibition of SUMOylation counteracts TRIM5 $\alpha$  nuclear localization in DCs, we next tested whether inhibition of SUMOylation restored TRIM5 $\alpha$  restriction in DCs. Human DCs were treated with 100  $\mu$ M GA for 24 hr and infected with EIAV. Untreated human DCs were permissive to EIAV, whereas GA treatment restored efficient restriction, leading to a 3- to 8-fold reduction in infectivity in three independent experiments (Figure 4E), suggesting that SUMOylation-dependent nuclear sequestration of TRIM5 $\alpha$  accounts for the observed lack of restriction in DCs. To determine whether GA-induced restriction is TRIM5 $\alpha$ -dependent, we performed GA treatment in the presence of siRNAs targeting TRIM5 $\alpha$ . Twenty-four hours prior to GA treatment, human DCs were DOTAP transfected with two different siRNAs targeting either TRIM5 $\alpha$  or Luc and then transduced with EIAV (Figure 4F). GA treatment induced strong anti-EIAV restriction in DCs, and this phenotype was reversed by TRIM5 $\alpha$  knockdown, indicating that GA-induced restriction in DCs is TRIM5 $\alpha$ -dependent. Further exploration is required to confirm this phenotype using replicative virus, however, no replicative EIAV was available at the time of the study. Together, our results show that the lack of restriction in DCs is explained by the SUMOylation-dependent re-localization of TRIM5 $\alpha$  to the

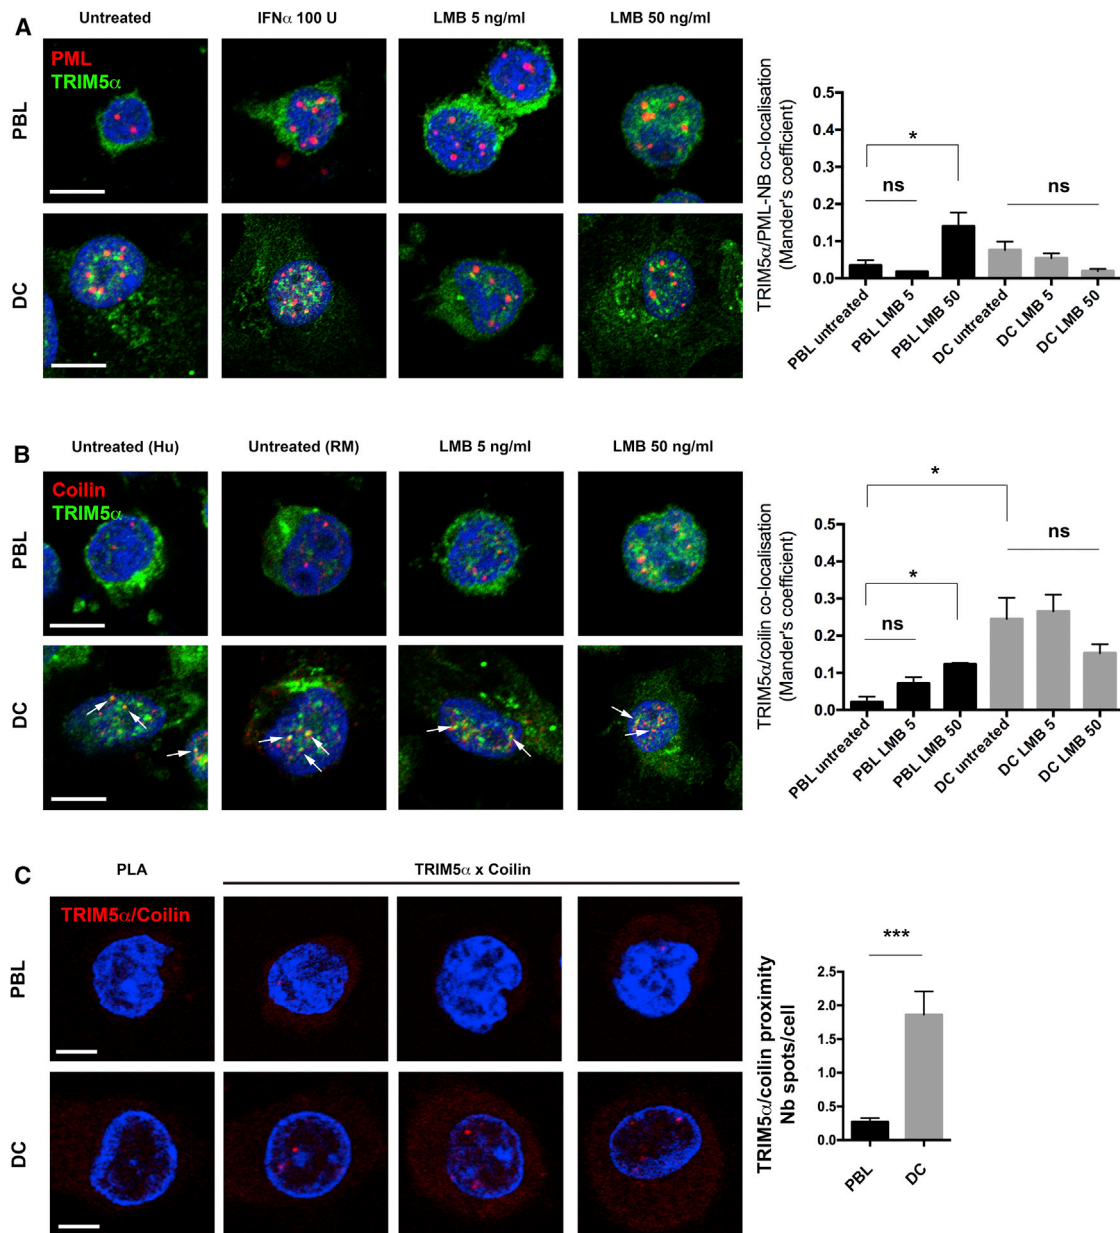

**Figure 3. Endogenous TRIM5 $\alpha$  Co-localizes with Cajal Bodies in Human and RM DCs**

(A and B) Co-localization of TRIM5 $\alpha$  with (A) PML-NB and (B) the Cajal body marker Coilin in human PBLs and DCs  $\pm$  100 U IFN $\alpha$  for 24 hr, 5 or 50  $\mu$ g/ml leptomycin B (LMB) for 4 hr. Scale bars represent 5  $\mu$ m. Co-localization was assessed using the Image J plugin Just Another Colocalization Plugin (JACoP) with threshold set at 20 for all images in both fluorescence channels. Graph shows Manders' coefficients for the fraction of PML-NB overlapping with TRIM5 $\alpha$ , mean of three independent experiments  $\pm$  SEM. In total, a minimum of  $\sim$ 50 cells were analyzed for each condition.

(C) Proximity between TRIM5 $\alpha$  and coilin was assessed by Duolink proximity ligation assay (red dots). Graph shows the average number of spots over the number of Hoechst-stained nuclei in eight random fields per cell type  $\pm$  SEM (Photoshop CS5).

Scale bars represent 5  $\mu$ m. Statistical significance was assessed by non-parametric unpaired t test (\*\* $p \leq 0.001$ ; \* $p \leq 0.05$ ; ns, non-significant).

nucleus and to Cajal bodies, thereby preventing contact with incoming retroviral capsids.

#### Nuclear-Sequestered TRIM5 $\alpha$ Is DeSUMOylated

SUMO modification of human and RM TRIM5 $\alpha$  was demonstrated using immobilized metal affinity chromatography on ex-

tracts prepared from HeLa cells overexpressing HA-tagged TRIM5 $\alpha$ , Ubc9, and 6  $\times$  His-SUMO1 (Dutrieux et al., 2015). To assess SUMO modification of TRIM5 $\alpha$  in primary DCs, we were limited by the fact that TRIM5 $\alpha$  overexpression cannot be used, since it reverses observed phenotypes, and endogenous TRIM5 $\alpha$  is present in quantities that are too small for pull-down

assays to be effective. We therefore analyzed post-translational modifications of endogenous TRIM5 $\alpha$  by western blotting. Preparation of PBLs and DCs lysates in the presence of iodoacetamide (IAA), a cysteine protease inhibitor that preserves post-translational modifications such as SUMOylation during the preparation of cell extracts, led to an increase in the molecular weight of the detected TRIM5 $\alpha$  band by  $\sim$ 15 kDa, which is suggestive of a mono-SUMO modification of TRIM5 $\alpha$  in both PBLs and DCs (Figure 5A). Quantification revealed that the proportion of TRIM5 $\alpha$ -70 relative to TRIM5 $\alpha$ -55 was greater in PBLs than DCs, and higher molecular weight bands were also visible in PBL extracts prepared in the presence of IAA, but less so in DCs (Figure 5A). These findings suggest that TRIM5 $\alpha$  may be more SUMO1-modified in PBLs than in DCs. To confirm that higher molecular weight bands correspond to SUMOylated TRIM5 $\alpha$ , IAA extracts were prepared from DCs treated or not with GA. GA treatment reduced overall protein SUMOylation, as observed by reduced smearing of SUMO2/3 labeling (Figure S3A) and decreased the detection of the higher molecular TRIM5 $\alpha$  weight bands (Figure S3B), confirming that these represent SUMO-modified forms of TRIM5 $\alpha$ .

To investigate the compartmentalization of TRIM5 $\alpha$  SUMOylation, we performed Duolink in situ proximity ligation assays (PLA), using TRIM5 $\alpha$  and SUMO1 primary antibodies, followed by species-specific PLA probes. The results revealed close proximity of TRIM5 $\alpha$  with SUMO with an average of  $7.1 \pm 1.2$  (SEM) spots per cell in PBLs, compared with  $2.2 \pm 0.4$  spots per cell in DCs, pointing to reduced TRIM5 $\alpha$ -SUMO interactions in DCs (Figure 5B). Treatment with ginkgolic acid (GA), a small molecule inhibitor of SUMO modification that blocks formation of the E1-SUMO intermediate (Fukuda et al., 2009), induced a dose-dependent reduction in TRIM5 $\alpha$ -SUMO1 proximity signals, suggesting that endogenous TRIM5 $\alpha$  is conjugated by SUMO1 or interacts with SUMOylated proteins in PBLs and DCs. TRIM5 $\alpha$ -SUMO1 signals were observed both in the cytoplasm and nucleus, indicating that SUMO-modified TRIM5 $\alpha$  can shuttle in and out of the nucleus. However, nuclear signals were rare in DCs ( $0.8 \pm 0.1$  spots per nucleus versus  $4.8 \pm 1.4$  in PBLs), suggesting that nuclear-localized TRIM5 $\alpha$  no longer associates with SUMO1 in DCs. To test this, we co-labeled TRIM5 $\alpha$  and SUMO1 in human DCs (Figure 5C). Both SUMO1 and TRIM5 $\alpha$  strongly localized to the nucleus, but the two did not co-localize, indicating that nuclear TRIM5 $\alpha$  does not associate with SUMO1 in DCs.

To confirm these observations, we analyzed TRIM5 $\alpha$  post-translational modifications in both nuclear and cytoplasmic fractions by western blotting. Cytoplasmic and nuclear fractions from human PBLs or DCs were prepared in the presence of IAA and loaded on gels such that for each subcellular fraction, the lane contained lysate from equal cell equivalents ( $4 \times 10^6$  cells), rather than equal protein amounts (Figure 5D). High molecular weight bands were observed in PBLs and DCs cytoplasmic fractions, suggesting that TRIM5 $\alpha$  is SUMOylated in both cell types, although imaging analysis revealed that cytoplasmic TRIM5 $\alpha$  is cytosolic in PBLs but Golgi-associated in DCs (Figure 2B). Total nuclear TRIM5 $\alpha$  was diminished in PBLs, as in Figure 2. In DCs, nuclear TRIM5 $\alpha$  detection was strong, but higher molecular weight bands were consistently

reduced, indicating that nuclear-localized TRIM5 $\alpha$  undergoes deSUMOylation.

### Nuclear Sequestration of TRIM5 $\alpha$ Allows Innate Sensing of Retroviral Infection by cGAS

Innate sensing of retroviral infections by DCs is crucial for the establishment of an efficient immune response required for infection control. To gain insight into the relevance of this TRIM5 $\alpha$  regulation mechanism, we asked whether inefficient restriction in DCs might correlate with efficient innate immune sensing.

To address this question, we induced cytoplasmic localization of TRIM5 $\alpha$  by overexpression of human TRIM5 $\alpha$  in human DCs and assessed innate sensing of retroviral infections by measuring cytokine expression and production following infection with viruses that are either restricted by human TRIM5 $\alpha$  (N-MLV and EIAV) or not restricted (HIV-1). Human DCs were transfected with the expression plasmid pLPCX-TRIM5 $\alpha$ -HA or pLPCX (empty vector [EV]). Transfection was preferred over lentiviral transduction to avoid high experimental background noise due to sensing of the lentiviral vector. After 24 hr, DCs were treated with 100  $\mu$ M GA to inhibit SUMOylation, 100  $\mu$ M TDF to block reverse transcription, or left untreated. After a further 24 hr, DCs were transduced with HIV-1, N-MLV, or EIAV eGFP vectors at MOI 5. DCs were harvested at 10 hpi to prepare DNA extracts and to perform qPCR analysis of reverse transcription products and at 24 hpi to prepare RNA extracts for qRT-PCR quantification of TRIM5 $\alpha$ , IFN $\alpha$ 1, IFN $\beta$ , IL6, and housekeeping transcripts. qPCR analysis of TRIM5 $\alpha$  transcripts confirmed an  $\sim$ 40-fold increase in TRIM5 $\alpha$  mRNA following overexpression in DCs (Figure 6A). Moreover, quantification of reverse transcription products revealed that all retroviruses underwent reverse transcription and this was specifically blocked by the reverse transcriptase inhibitor TDF or by heat-inactivation of vectors prior to infection (Figure 6B). Overexpression of human TRIM5 $\alpha$  led to a 70%–80% reduction in reverse transcription products of N-MLV and EIAV, but had only limited impact on HIV-1 reverse transcription, confirming that overexpression of TRIM5 $\alpha$  in DCs restores efficient TRIM5 $\alpha$ -mediated restriction of susceptible viruses (Figures 5B and 6B). Similarly, GA treatment, which induces forced re-localization of TRIM5 $\alpha$  to the cytoplasm by blocking its SUMOylation-dependent targeting to Cajal bodies (Figure 4C), also reduced reverse transcription of N-MLV and EIAV without affecting HIV-1 (Figure 6B).

To assess sensing of retroviral infection by DCs, we measured cytokine expression following infection. IFN $\alpha$ 1 and IFN $\beta$  were induced 5- to 20-fold by HIV-1, N-MLV, and EIAV infection (Figures 6C and 6D), indicating that these viruses are sensed in human DCs, as previously shown for HIV-1 (Silvin and Manel, 2015; van Montfoort et al., 2014). In contrast, IL6 expression was not significantly induced, suggesting that the host sensor involved likely operates via IRF-3 and not NF- $\kappa$ B (Figure 6E). Infection in the presence of TDF abolished sensing (Figures 6C and 6D), at both 24 hpi and 8 hpi, indicating that the recognized PAMP is reverse transcribed DNA, as previously shown (Gao et al., 2013; Lahaye et al., 2013; Rasaiyaah et al., 2013; Yoh et al., 2015). Overexpression of human TRIM5 $\alpha$  in the cytoplasm strongly reduced IFN $\alpha$  and IFN $\beta$  expression (5- to 10-fold), but not IL6 levels, following N-MLV and EIAV infection, pointing to



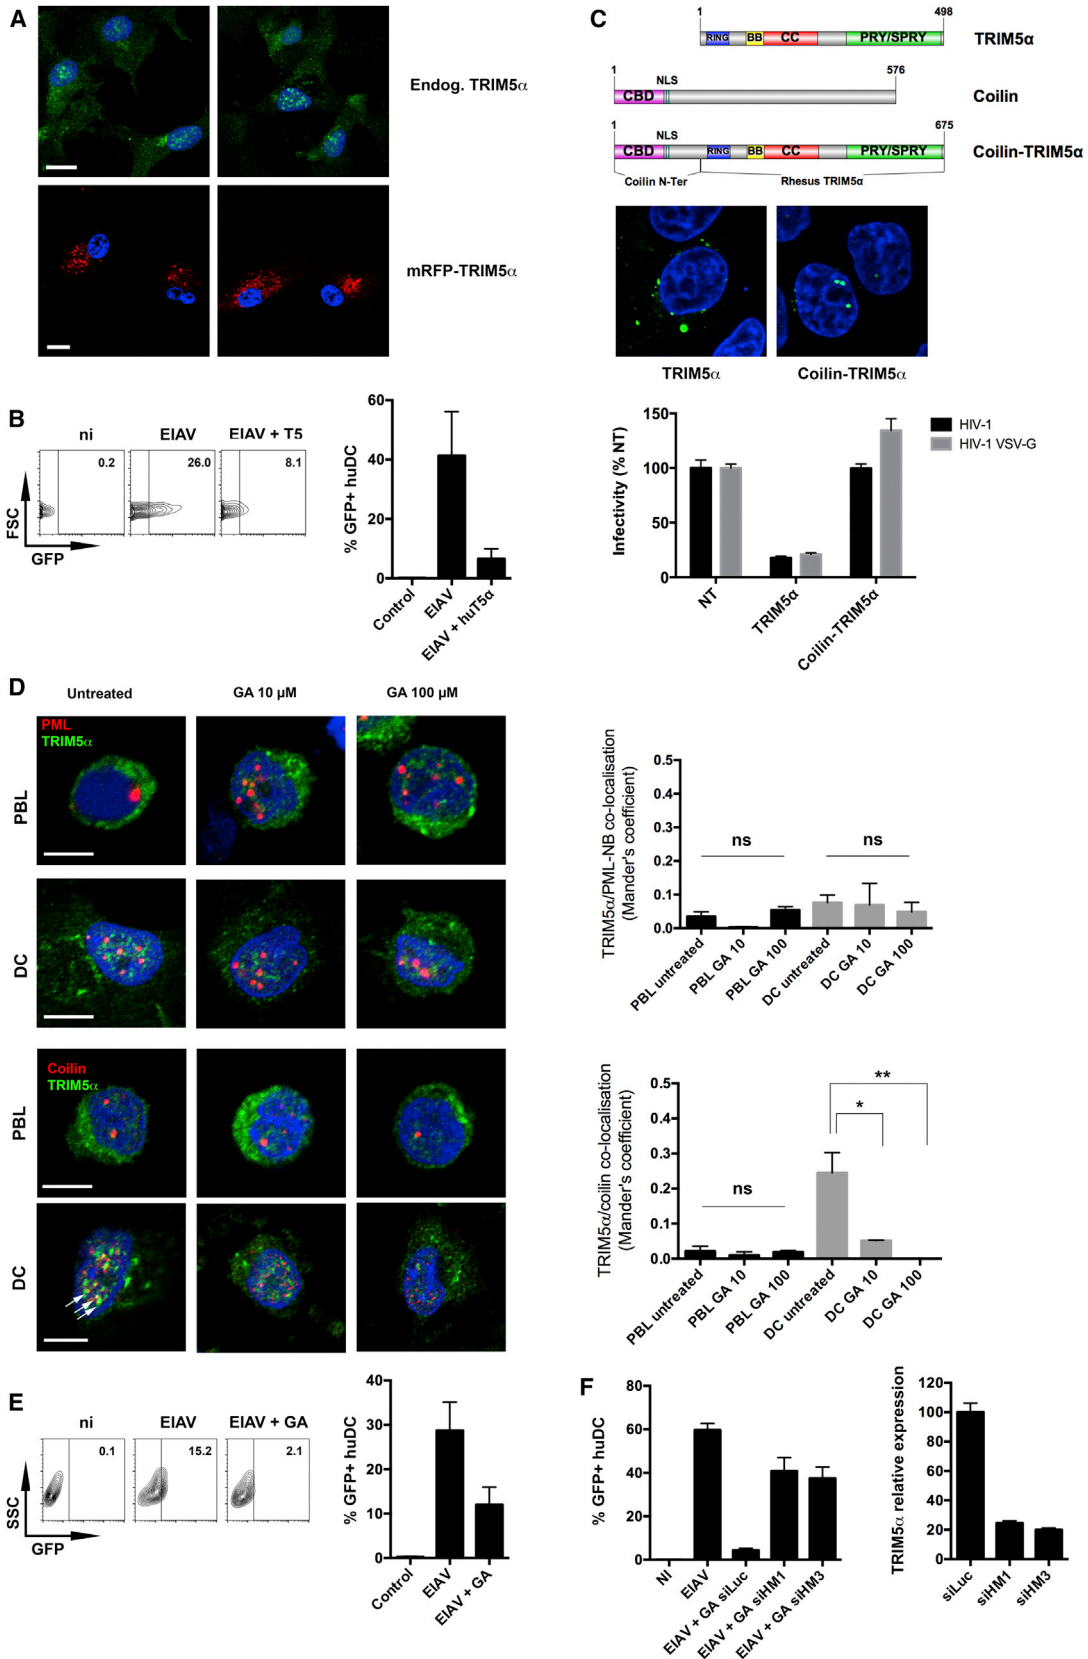

(legend on next page)

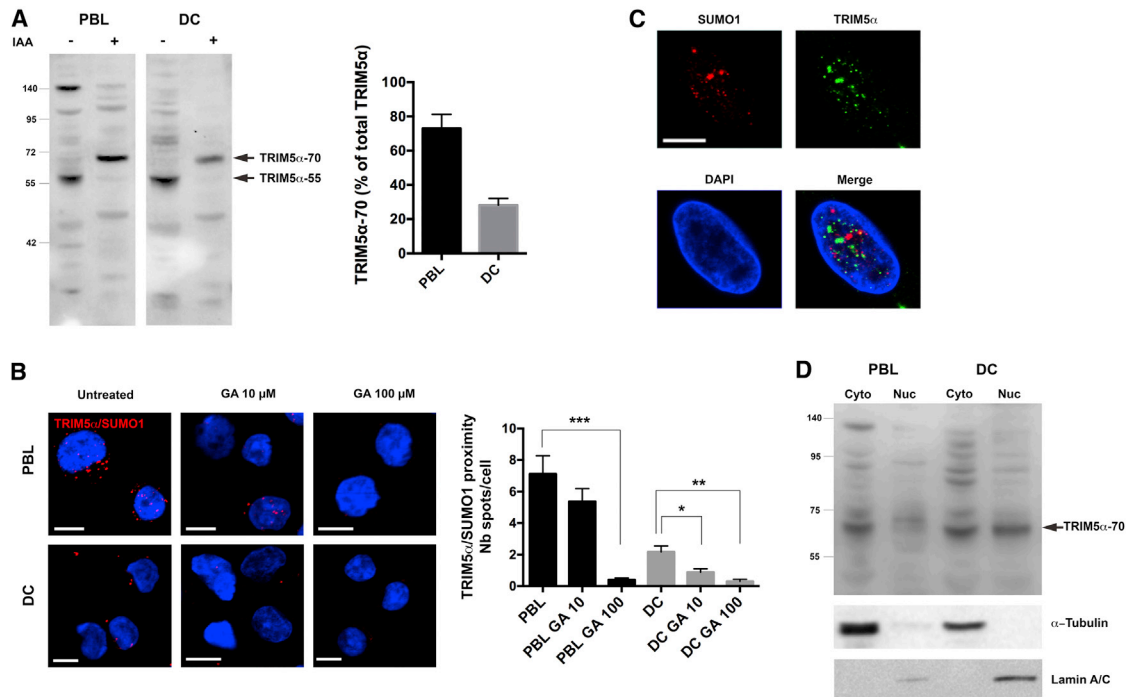

**Figure 5. TRIM5 $\alpha$  deSUMOylation in DCs Nucleus Contributes to Its Nuclear Sequestration**

(A) Human DCs extracts were prepared in the presence or absence of IAA (10 mM). Arrows point to TRIM5 $\alpha$  (TRIM5 $\alpha$ -55) and post-translationally modified TRIM5 $\alpha$  (TRIM5 $\alpha$ -70). The graph shows TRIM5 $\alpha$ -70 normalized band intensity as percentage of total (TRIM5 $\alpha$ -55 and TRIM5 $\alpha$ -70) for three independent experiments  $\pm$  SD (ImageJ).

(B) TRIM5 $\alpha$  and SUMO1 co-localization was assessed by Duolink proximity assay (red dots) in PBLs and DCs  $\pm$  10 or 100  $\mu$ M GA for 24 hr. Scale bars represent 5  $\mu$ m. Graph shows the average number of spots over the number of Hoechst-stained nuclei in eight random fields per cell type  $\pm$  SEM (Photoshop CS6). Statistical significance was assessed by non-parametric unpaired t test (\*\* $p \leq 0.001$ ; \*\* $p \leq 0.01$ ; \* $p \leq 0.05$ ; ns, non-significant).

(C) Lack of TRIM5 $\alpha$  (green) and SUMO-1 (red) co-localization in human DC nuclei.

(D) Cytoplasmic and nuclear fractions from human PBLs or DCs were prepared in the presence of IAA and loaded as equal cell equivalents. Tubulin and lamin A/C control for the purity of cytoplasmic and nuclear fractions only and should not be considered as loading control since PBLs and DCs differ substantially in tubulin and lamin A/C levels per cell. See also Figure S3.

inefficient sensing following forced altered localization of restrictive TRIM5 $\alpha$  to the cytoplasm (Figures 6C–6E). In contrast, HIV-1 sensing was not diminished by human TRIM5 $\alpha$  overexpression, which is concordant with the fact that TRIM5 $\alpha$  overexpression

did not reduce HIV-1 reverse transcripts (Figure 6B). The defect in type I IFN production was confirmed by measuring levels of type I IFN released in supernatants from infected DCs at 48 hr post-infection using HL116 indicator cells (Figure S3C).

**Figure 4. SUMOylation-Dependent Mislocalization of TRIM5 $\alpha$  in DCs Accounts for Lack of Restriction**

(A) Human DCs were labeled with anti-TRIM5 $\alpha$  antibody (above), or transduced with mRFP-TRIM5 $\alpha_{hu}$  for 48 hr (below). Two representative confocal images are shown for each condition. Scale bar represents 10  $\mu$ m.

(B) Human DCs were transduced or not with mRFP-TRIM5 $\alpha_{hu}$  for 2 days and infected with EIAV-eGFP vector at MOI 1. Representative flow cytometry charts at 3 dpt are shown left, while the graph shows the mean of three independent experiments  $\pm$  SEM.

(C) RM TRIM5 $\alpha$  was fused in frame at its amino terminus with the first 112 aa of human coilin, comprising the Cajal body targeting domain (CBD) and a NLS. P4-CCR5 cells transduced with TRIP-TRIM5 $\alpha_{th}$ , TRIP-Coilin-TRIM5 $\alpha_{th}$ , or untransduced (NT) were labeled for TRIM5 $\alpha$  for immunofluorescence detection and challenged with HIV-1 LAI with either wild-type envelope or VSV-G.  $\beta$ -galactosidase activity at 48 hpi is shown normalized by Bradford as the mean of two independent experiments carried out in triplicate  $\pm$  SD.

(D) Co-localization of TRIM5 $\alpha$  and Coilin was measured as in Figure 3B in human PBLs and DCs  $\pm$  10 or 100  $\mu$ M GA for 24 hr. Graph shows Manders' coefficients for the fraction of coilin-labeled Cajal bodies overlapping with TRIM5 $\alpha$ , mean of three independent experiments  $\pm$  SEM with a minimum of  $\sim$ 50 cells analyzed for each condition. Statistical significance was assessed by unpaired t test (\*\* $p \leq 0.001$  \*\* $p \leq 0.01$  \* $p \leq 0.05$ ; ns, non-significant). White arrows point to areas of co-localization.

(E) Human DCs were treated or not with 100  $\mu$ M GA for 24 hr and infected with EIAV-eGFP vector at MOI 1. Representative flow cytometry charts at 3 dpt are shown left, while the graph shows the mean of three independent experiments  $\pm$  SEM.

(F) Human DCs were lipofected or not with two different siRNAs targeting human TRIM5 $\alpha$  (HM1 and HM3) or control siLuc (day 0)  $\pm$  100  $\mu$ M GA (day 1) and EIAV-eGFP at MOI 1 (day 2). TRIM5 $\alpha$  mRNA expression on day 3 is normalized for housekeeping transcript RPL13A (60S ribosomal protein L13a) with siLuc arbitrarily set to 1. GFP expression on day 4 is the mean of two experiments  $\pm$  SD.

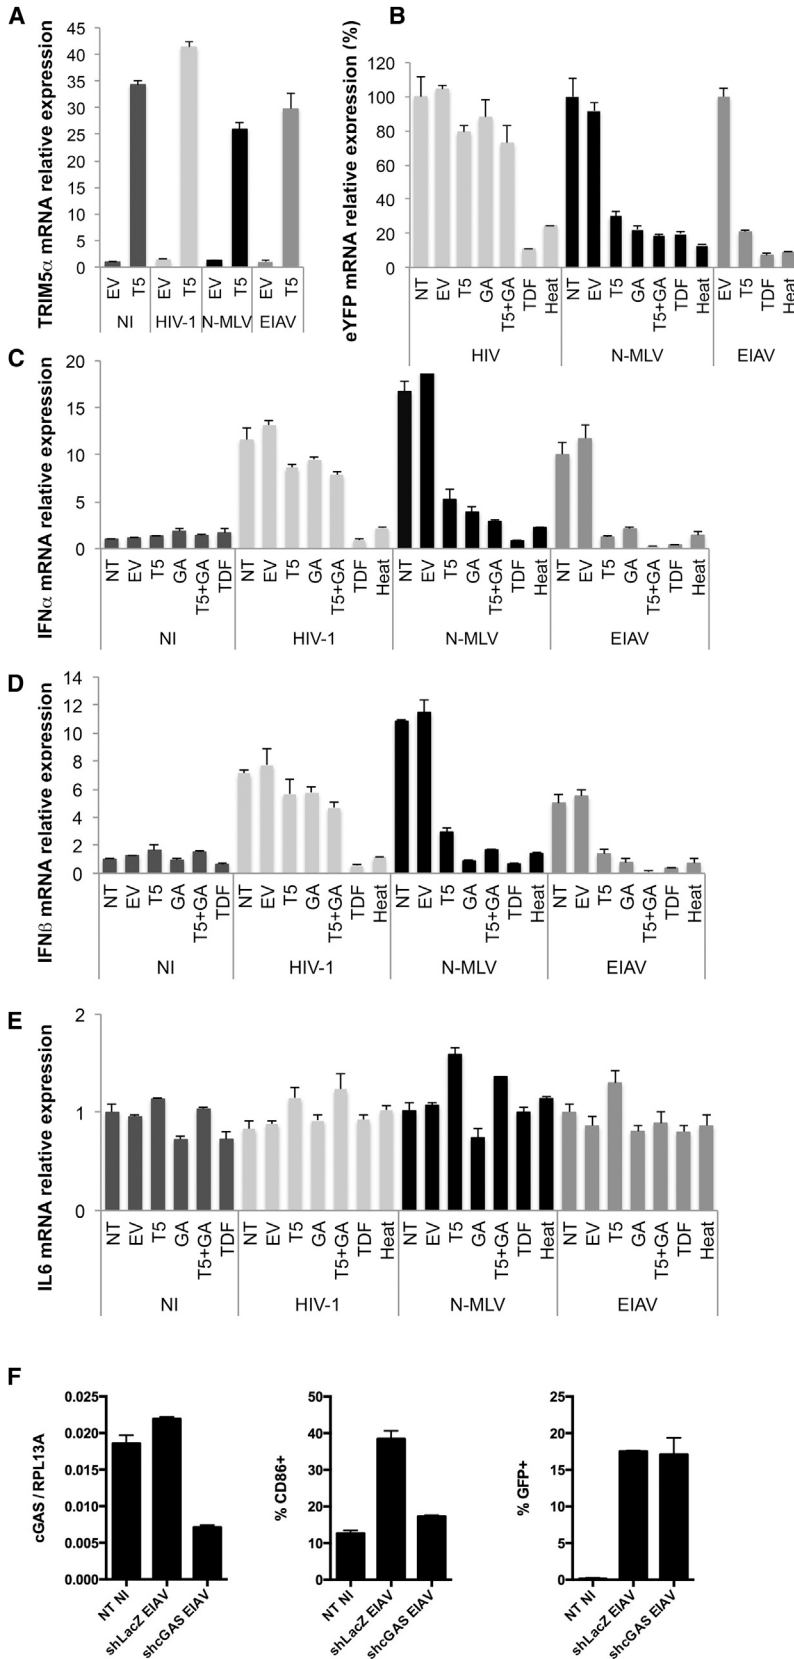

**Figure 6. Forced Altered Localization of TRIM5 $\alpha$  by Overexpression of TRIM5 $\alpha$  or Inhibition of SUMOylation Reduces Type I IFN Induction following Retroviral Infection**

Human DCs were DOTAP transfected with pLPCX TRIM5 $\alpha$ -HA (T5) or empty pLPCX (EV) at  $1 \mu\text{g DNA}/0.1 \times 10^6$  DCs, or left untransfected (day 0)  $\pm$  100  $\mu\text{M}$  GA or 100  $\mu\text{M}$  TDF (day 1) and infected with indicated retroviruses at MOI 5 (day 2).

(A) TRIM5 $\alpha$  mRNA expression normalized for housekeeping transcript RPL13A (60S ribosomal protein L13a). NI EV cells were arbitrarily set to 1.

(B) Infection efficiency was assessed by qPCR of eGFP/eYFP DNA in DCs extracts at 10 hpi. eGFP/eYFP signal was normalized for housekeeping gene GAPDH. NT or EV were arbitrarily set to 100% for each infection. Signal was undetectable for non-infected samples.

(C–E) IFN $\alpha$  (C), IFN $\beta$  (D), and IL6 (E) mRNA expression levels were assessed by reverse transcription qPCR at 24 hpi, normalized for housekeeping transcript  $\beta$ 2M. NI NT cells were arbitrarily set to 1. All panels are representative of at least three independent experiments on different donors.

See also [Figure S4](#).

Similarly, the inhibition of SUMOylation by GA treatment of DCs led to a stark reduction in IFN $\alpha$  and IFN $\beta$  transcripts (5- to 10-fold), but not IL6, confirming that the restoration of TRIM5 $\alpha$  restriction in DCs by blocking the SUMO machinery reduces efficient sensing of retroviral infection (Figures 6C–6E). Combining GA treatment with TRIM5 $\alpha$  overexpression generally further accentuated the block in type I IFN expression following N-MLV or EIAV infection. On the other hand, GA treatment did not affect sensing of HIV-1, indicating that non-specific effects of GA treatment other than TRIM5 $\alpha$  regulation are unlikely.

TRIM5 $\alpha$  has been reported to contribute to innate immune sensing of HIV-1 infection (Pertel et al., 2011). To determine whether endogenous TRIM5 $\alpha$  contributes to viral sensing by DCs, we measured IFN $\alpha$ 1, IFN $\beta$ , and IL6 expression following infection by HIV-1, N-MLV, EIAV in DCs transfected or not with TRIM5 $\alpha$ -specific siRNAs (Figure S4). HIV-1, N-MLV, and EIAV all induced type I IFN production as already shown in Figure 6, and knockdown of TRIM5 $\alpha$  had no effect on IFN $\alpha$ 1, IFN $\beta$ , or IL6 expression following infection, indicating that endogenous TRIM5 $\alpha$  does not contribute to viral sensing by DCs. This is concordant with our results showing that TRIM5 $\alpha$  is sequestered in the nucleus away from incoming retroviruses. Several groups have shown that the pathogen recognition receptor (PRR) for reverse transcribed DNA during retroviral infection is cGAS (Gao et al., 2013; Lahaye et al., 2013; Rasaiyaah et al., 2013; Yoh et al., 2015). To assess whether cGAS is responsible for innate sensing of retroviral infection in human DCs, we transduced DCs with short hairpin RNAs (shRNAs) targeting either cGAS or, as a control, LacZ and monitored CD86 induction by infection. cGAS knockdown prevented induction of CD86 expression by EIAV in DCs, indicating that cGAS is a sensor of EIAV infection (Figure 6F).

Together, these results suggest that DCs cannot both efficiently restrict and efficiently sense an incoming retrovirus. In wild-type DCs, where TRIM5 $\alpha$  is not present in the cytoplasm to intercept incoming viruses, retroviruses are not restricted, and the reverse transcribed provirus is efficiently detected by a host sensor that triggers type I IFN production. Conversely, if TRIM5 $\alpha$  is forced to the cytoplasm by overexpression or inhibition of the SUMO pathway, retroviruses are restricted but are no longer sensed, since restriction inhibits viral DNA synthesis and all downstream replication events.

## DISCUSSION

In this study, we investigated the mechanism responsible for lack of TRIM5 $\alpha$ -mediated restriction in human and non-human primate DCs. DCs from rhesus and cynomolgus macaques, African green monkeys, and humans were all found to be permissive to retroviruses that are normally restricted by TRIM5 $\alpha$  from these species. Although TRIM5 $\alpha$  in lymphocytes is mainly cytoplasmic, it accumulates within NB that partly co-localize with Cajal bodies in rhesus and human DCs. Nuclear sequestration of TRIM5 $\alpha$  in DCs was SUMOylation-dependent and correlated with the lack of retroviral restriction. Forced cytoplasmic localization of TRIM5 $\alpha$ , either through TRIM5 $\alpha$  overexpression or the inhibition of SUMOylation, restored efficient restriction in DCs but abolished sensing of the reverse transcribed viral genome by cGAS. Inefficient restriction in DCs may paradoxically promote

effective immune control if it results in effective sensing. Thus, the absence of efficient TRIM5 $\alpha$  restriction in DCs might have evolved to ensure appropriate sensing of retroviral infections by host cell sensors.

Our results indicate that TRIM5 $\alpha$  can be SUMO modified and undergo nucleo-cytoplasmic shuttling in both PBLs and DCs, but only in DCs does SUMO modification of TRIM5 $\alpha$  lead to Cajal body targeting and nuclear sequestration (Figure 7). It is not known how targeting of TRIM5 $\alpha$  to Cajal bodies is mediated. Although TRIM5 $\alpha$  can be SUMO modified, we cannot exclude that an interaction between TRIM5 $\alpha$  SIM domains with a SUMOylated shuttling protein is also involved. Interestingly, the Cajal body marker coilin is both directly SUMOylated and contains putative SIMs and could therefore mediate TRIM5 $\alpha$  nuclear targeting. In PBLs, endogenous TRIM5 $\alpha$  remains essentially cytoplasmic despite shuttling, and forced accumulation in the nucleus by LMB treatment leads only to nucleoplasmic localization. Further work on differences in Cajal body biology comparing PBLs and DCs may shed light on the differential nuclear targeting of TRIM5 $\alpha$  in these cells. Cajal bodies participate in the biogenesis of spliceosomal small nuclear (snRNP) and small nucleolar RNP (snoRNP) (Cioce and Lamond, 2005; Machyna et al., 2013; Morris, 2008), and it is unclear why TRIM5 $\alpha$  localizes to Cajal bodies in DCs. One possible indication comes from the observation that TRIM5 $\alpha$  was less SUMO-modified and SUMO-associated in the nuclei of DCs, suggesting its targeting to Cajal bodies may lead to its deSUMOylation and consequent nuclear sequestration. Intriguingly, a novel SUMO isopeptidase ubiquitin-specific protease like 1 (USPL1) was recently identified in Cajal bodies (Schulz et al., 2012). It is also noteworthy that only approximately one-third of nuclear TRIM5 $\alpha$  co-localized with the Cajal body marker coilin at any one time. Although this may be explained by the dynamic and transient nature of Cajal bodies or by the fact that some Cajal bodies are coilin-negative (Cioce and Lamond, 2005; Machyna et al., 2013; Morris, 2008), it is also possible that following SUMO-dependent targeting of TRIM5 $\alpha$  to Cajal bodies, deSUMOylated TRIM5 $\alpha$  leaves Cajal bodies and remains in the nucleoplasm. Further work will be required to specifically test the involvement of E3 SUMO ligases and SUMO isopeptidases in TRIM5 $\alpha$  SUMO modification. TRIM5 $\alpha$  regulation by SUMOylation is likely to be a finely-tuned mechanism since overexpression of TRIM5 $\alpha$  led to strong accumulation of TRIM5 $\alpha$  within cytoplasmic bodies but negligible nuclear localization, suggesting that the cellular SUMOylation machinery had been overridden.

In DCs, nuclear sequestration of TRIM5 $\alpha$  was associated with efficient innate sensing of retroviral infection resulting in substantial type I interferon production. Conversely, induced cytoplasmic expression of TRIM5 $\alpha$  in DCs restored restriction but impaired viral sensing, suggesting that restriction of incoming retroviral complexes by cytoplasmic TRIM5 $\alpha$  prevents the detection of one or more key viral PAMPs. Retroviral infection of DCs may be detected by a number of cell host sensors at different stages of the viral cycle: RIG-I-like receptors (RLR), toll-like receptors (TLR), and DNA sensors such as IFI16 and cGAS (Cerboni et al., 2013; Luban, 2012; Melchjorsen, 2013; van Montfoort et al., 2014). Retroviral capsid recognition by TRIM5 $\alpha$  can signal production of pro-inflammatory cytokines

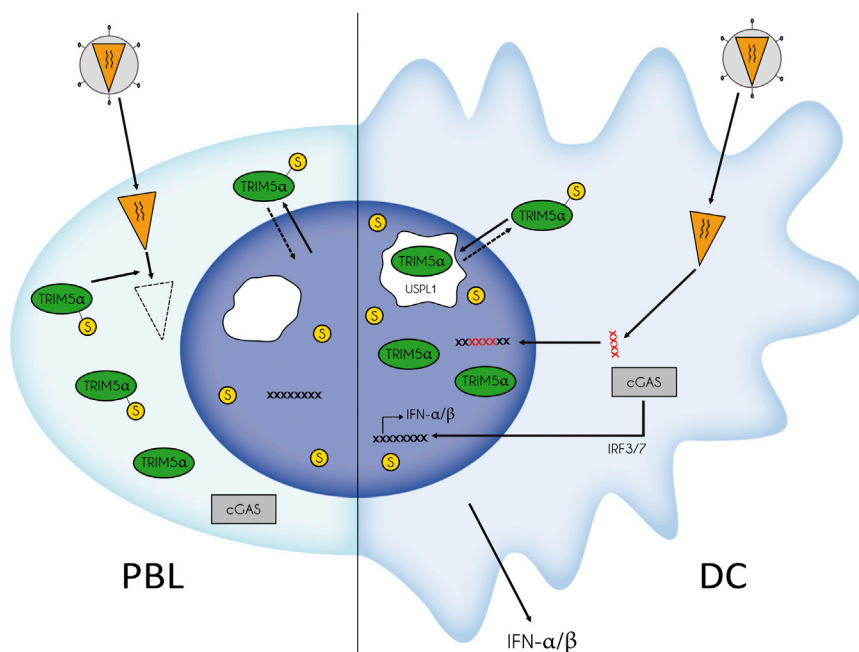

**Figure 7. Schematic Diagram Showing the Effect of SUMOylation on the Localization of TRIM5 $\alpha$  and Its Ability to Restrict Retroviral Infections in Primary Lymphocytes and Dendritic Cells**

When SUMOylated, TRIM5 $\alpha$  shuttles freely between the cytoplasm and the nucleus, although in lymphocytes its nuclear residency is brief and may only be seen upon LMB treatment. Upon retroviral infection of lymphocytes, cytoplasmic TRIM5 $\alpha$  intercepts incoming capsids and induces their degradation. In DCs, SUMOylated TRIM5 $\alpha$  is targeted to Cajal bodies where it likely undergoes deSUMOylation by isopeptidases such as USPL1. DeSUMOylated TRIM5 $\alpha$  remains trapped in the nucleus and accumulates within Cajal bodies and the nucleoplasm. Retroviral infection of DCs can proceed unhampered in the absence of cytoplasmic TRIM5 $\alpha$ , and reverse transcribed retroviral genomes are sensed by the cytosolic sensor cGAS, which signals interferon type I production. Overexpression of TRIM5 $\alpha$ , which likely overwhelms the SUMOylation machinery, or GA treatment, which prevents TRIM5 $\alpha$  SUMOylation, both prevent import of de novo synthesized TRIM5 $\alpha$  to the nucleus, restore TRIM5 $\alpha$ -mediated restriction and abrogate sensing by cGAS.

(Pertel et al., 2011; Uchil et al., 2013). However, type I IFN production was by far the more potent signaling outcome of retroviral sensing in DCs. The use of the reverse transcriptase inhibitor TDF abolished type I IFN production following infection, indicating that the retroviral PAMP that is recognized in infected DCs is reverse transcribed DNA and is unlikely to be capsid. Several groups have shown that the PRR for reverse transcribed DNA during retroviral infection is cGAS (Gao et al., 2013; Lahaye et al., 2013; Rasaiyaah et al., 2013; Yoh et al., 2015). Our work confirms that cGAS is the PRR that signals sensing in human DCs infected by N-MLV or EIAV when TRIM5 $\alpha$  is sequestered in the nucleus (Figure 7).

Since TRIM5 $\alpha$  blocks reverse transcription (Stremlau et al., 2004, 2006), efficient restriction in DCs would block innate detection of PAMPs generated by incoming retroviruses downstream of reverse transcription, including reverse transcribed viral DNA, RNA transcripts, and de novo synthesized Gag. In addition, efficient restriction would be likely to prevent integration and presentation of endogenous viral peptides on MHC-I molecules for CD8<sup>+</sup> T cell priming. Both innate sensing and triggering of adaptive response of retroviral infection by DCs are crucial for an efficient immune response and the control of infection. Given that all tested DCs lacked efficient TRIM5 $\alpha$  restriction, we speculate that absence of TRIM5 $\alpha$  restriction might have evolved in DCs frequently exposed to retroviral infections in order to ensure both efficient innate detection of incoming retroviruses by host cell sensors and presentation of viral epitopes to cytotoxic T cells. Conversely, preservation of efficient restriction of incoming retroviruses in lymphocytes, which we confirmed in all tested human and non-human primates, makes an important contribution to the defense of this cell population, which is a key target of many retroviruses (Hatzioannou et al., 2009; Soll et al., 2013).

Of note, the phenotypes described in this study for endogenous TRIM5 $\alpha$  are entirely abrogated by the expression of exogenous TRIM5 $\alpha$ . Overexpression following standard transduction protocols led to a dramatic ~40-fold increase in TRIM5 $\alpha$  mRNA, underlining the non-physiological nature of TRIM5 $\alpha$  overexpression. The dichotomy between results obtained with endogenous TRIM5 $\alpha$  and overexpressed protein have been described previously (Zhang et al., 2008), confirming that caution must be exercised when interpreting data based on overexpressed TRIM5 $\alpha$  protein. In this regard, the seeming discordance between our study and previous work showing potent NF- $\kappa$ B-dependent transcription following the sensing of retroviral capsid by TRIM5 $\alpha$  (Pertel et al., 2011) may be explained by the fact that the regulation of TRIM5 $\alpha$  function by SUMOylation that we describe here was observed only with endogenous TRIM5 $\alpha$  protein and only in primary DCs.

In conclusion, our study reveals that the ability of TRIM5 $\alpha$  to restrict incoming retroviruses in human and non-human primates is lost in DCs as a result of its SUMOylation-dependent sequestration in nuclear Cajal bodies. This lack of restriction allows efficient innate sensing of incoming retroviruses by DC host cell sensors and likely contributes to improved viral control in the infected host. This evolutionary trade-off specific to DCs underlines the multi-valence of DC functions at the crossroads between innate and adaptive immunity, and the ability of DCs to fine-tune their antigen-presenting and sensing functions to best confront recurrent viral exposures.

## EXPERIMENTAL PROCEDURES

### Blood Sampling

Young (3–4 years old) male cynomolgus macaques (*Macaca fascicularis*) imported from Mauritius, 6- to 10-year-old pigtailed macaques (*Macaca*

*nemestrina*) originating from the Palmyre Zoo (Les Mathes, France), and 3- to 4-year-old African green monkeys (*Chlorocebus sabaeus*) were housed at the Institut Pasteur non-human primates facility. Rhesus macaques (*Macaca mulatta*) were housed at the CEA (Fontenay-aux-Roses). Monkeys were tested negative for SIV, simian herpes B, filovirus, STLV-1, SRV-1, SRV-2, measles virus, hepatitis B-HbsAg, and hepatitis B-HBcAb before inclusion in the study. Blood sampling was conducted in accordance with guidelines established by the French and European regulations for the care and use of laboratory animals (Animal Welfare Assurance Number: A5476-01). Blood from the saphenous vein was collected using heparin tubes or BD Vacutainer CPT cell preparation tube with sodium heparin. Blood volume and bleeding frequency were defined as a function of animal weight according to the GIRCOR recommendations. Human buffy coats and cytopheresis rings were obtained from the Etablissement de Sang Français (EFS Rungis and Hôpital Saint-Louis).

### Cells

PBMC were isolated using Ficoll (100% and 95% for human and monkey blood, respectively) (Biochrom). Monocytes were isolated from PBMC using adherence on plastic for 45 min. DCs were derived from monocytes following 4- to 5-day differentiation using 50 ng/ml GM-CSF (Immunotools) and 20 ng/ml recombinant human of RM IL4 (Immunotools). PBLs were activated by treatment with phytohaemagglutinin (PHA, 10  $\mu$ g/ml) for 2–3 days and concanavalin A (Con A, 5  $\mu$ g/ml) (Sigma) for human and non-human primate samples, respectively, and induced to proliferate by treatment with human recombinant IL2 (10 ng/ml) (Sigma). The differentiation and activation phenotypes of cells were systematically checked by phenotypic markers using flow cytometry (Figure S1A). The human fibrosarcoma HL116 cell line carries the luciferase gene under control of the IFN-inducible 6-16 promoter (Uzé et al., 1994). HL116 cells were grown in medium supplemented with HAT (hypoxanthine: 20  $\mu$ g/ml, aminopterin: 0.2  $\mu$ g/ml, thymidine: 20  $\mu$ g/ml). P4-CCR5 are HeLa-based cells that express CD4 and CCR5 and have Tat-inducible  $\beta$ -galactosidase activity.

### Plasmids, Vectors, Viruses

Lentiviral and retroviral vectors used were HIV-1 (TRIP-CMV-GFP, Pierre Charneau, Institut Pasteur), SIVmac239 (GAE-CAG-GFP, François-Loïc Cosset, ENS Lyon), EIAV-eGFP (ONY8.9, Oxford Biomedica), and N-MLV-eYFP expressing vectors (Jonathan Stoye, MRC London). MLV-based retroviral vectors pLPCX-TRIM5 $\alpha_{th}$ -HA and pLPCX-TRIM5 $\alpha_{hu}$ -HA were provided by J. Sodroski (Stremlau et al., 2004). RM and human TRIM5 $\alpha$  were fused in frame to the mRFP fluorophore or the first 102 aa of coilin in N-ter by strand overlap PCR. Human coilin was amplified from pENTR-COIL plasmid (Addgen #16172). Fusion constructs were cloned within the pTRIP vector within KpnI/XhoI restriction sites to generate the following constructs: pTRIP-CMV-mRFP-TRIM5 $\alpha_{th}$ , pTRIP-CMV-mRFP-TRIM5 $\alpha_{hu}$ , pTRIP-CMV-COI-TRIM5 $\alpha_{th}$ , and pTRIP-CMV-COI-TRIM5 $\alpha_{hu}$ . Viruses were SIVmac239, HIV-1 LAI, VSV-G pseudotyped LAI, VSV-G pseudotyped NL4-3-IRES-eGFP, and R5-tropic NL4-3-92th014.12-IRES-eGFP (Papkalla et al., 2002). Vectors and viruses were produced in HEK293T cells by calcium phosphate co-transfection of vector/virus plasmid, Gag-Pol expressing plasmid for vectors, and pVSV-G for pseudotyping. Supernatants were collected 48 hr post-transfection, and vector particles were concentrated by ultracentrifugation at 22,000 rpm for 1 hr at 4°C (Beckman SW41). *Mus dunni* tail fibroblast (MDTF) cells devoid of TRIM5 $\alpha$ , APOBEC3G, and tetherin restriction factors, were used to titer vectors (Carthagen et al., 2008). Viral stocks were quantified by p24/p27 ELISA (Perkin Elmer and Zeptomatrix).

### Transductions, Transfections

Vector transductions of PBLs and DCs were performed at MOI 0.25–5 (TU/cell) in the presence of cytokines. eGFP or eYFP expression was assessed by flow cytometry or qPCR at 3–4 days post-transduction (dpt). As a control, vectors were heat inactivated by incubation at 56°C in a water bath for 2 hr with frequent mixing prior to transduction. Plasmid and siRNA transfections of human DCs were performed using DOTAP (Roche Molecular) at 1  $\mu$ g DNA or 160 nM siRNA/0.1  $\times$  10<sup>6</sup> DCs according to manufacturer's instructions.

### Imaging

PBLs were cytospun onto poly-L-lysine (Sigma-Aldrich)-treated coverslips for 5 min at 500  $\times$  g to optimize cell attachment and cytoplasmic spread. DCs were seeded onto collagen-treated coverslips to minimize autofluorescence. Imaging was performed using a Zen 2012 LSM700 and LSM780 confocal microscopes (Zeiss) with a Plan-Apochromat 63 $\times$ /NA 1.4 objective. Duolink proximity ligation assay (PLA) was performed according to manufacturer's instructions (Olink Biosciences).

### Fractionation

Cytoplasmic and nuclear fractions from 4  $\times$  10<sup>6</sup> PBLs or DCs were prepared using NE-PER isolation kit (Pierce). Fractions were loaded onto 10% SDS-polyacrylamide gel using equal cell equivalents rather than protein amounts. The purity of subcellular fractionations was confirmed using tubulin and lamin A/C for the cytoplasmic and nuclear fractions, respectively. Quantification of protein bands was performed using ImageJ.

### SUPPLEMENTAL INFORMATION

Supplemental Information includes Supplemental Experimental Procedures and four figures and can be found with this article online at <http://dx.doi.org/10.1016/j.celrep.2015.12.039>.

### AUTHOR CONTRIBUTIONS

D.M.P., J.F., M.R., A.K.M., A.B., M.M., A.-S.B., S.N., and N.J.A. conducted the experiments. A.-S.B., M.M.T., F.K., S.N., and N.J.A. designed the experiments. All authors contributed to writing the manuscript.

### ACKNOWLEDGMENTS

This work was supported by grants from the Agence Nationale de Recherches sur le SIDA et les hépatites virales (ANRS), the ATIP-Avenir program (INSERM), the Deutsche Forschungsgemeinschaft (DFG), European FP7 "HIT HIDDEN HIV" (305762), a DFG Leibniz award, and an Advanced ERC Investigator grant (to F.K.). For veterinary support, NHP welfare, and biological specimens sampling, we thank Nathalie Dereuddre-Bosquet and Céline Gomet (CEA Fontenay-aux-Roses) for RM and CM, Thierry Petit (Zoo de la Palmyre, Les Mathes) for PTM, and Anne-Sophie Liovat for AGM. We thank Paul Bieniasz (Aaron Diamond AIDS Research Center) for the rabbit TRIM5 $\alpha$  antibody, Nicolas Manel (Institut Curie) for the cGAS shRNA construct, Cyril Pantoli for graphic design, and Ron Hay (University of Dundee) and Allan Hance (Hôpital Saint-Louis) for helpful discussions. Protein diagrams were prepared using Illustrator for Biological Sequences. Microscopy experiments were performed at the Imagopole (Institut Pasteur) and the technology platform of Hôpital Saint-Louis.

Received: July 10, 2015

Revised: October 20, 2015

Accepted: December 6, 2015

Published: December 31, 2015

### REFERENCES

- Arhel, N.J., Nisole, S., Carthagen, L., Coutant, F., Souque, P., Brussel, A., Estaquier, J., and Chameau, P. (2008). Lack of endogenous TRIM5 $\alpha$ -mediated restriction in rhesus macaque dendritic cells. *Blood* 112, 3772–3776.
- Arriagada, G., Muntean, L.N., and Goff, S.P. (2011). SUMO-interacting motifs of human TRIM5 $\alpha$  are important for antiviral activity. *PLoS Pathog.* 7, e1002019.
- Berger, G., Durand, S., Goujon, C., Nguyen, X.N., Cordeil, S., Darlix, J.L., and Cimarelli, A. (2011). A simple, versatile and efficient method to genetically modify human monocyte-derived dendritic cells with HIV-1-derived lentiviral vectors. *Nat. Protoc.* 6, 806–816.
- Besnier, C., Takeuchi, Y., and Towers, G. (2002). Restriction of lentivirus in monkeys. *Proc. Natl. Acad. Sci. USA* 99, 11920–11925.

- Bieniasz, P.D. (2004). Intrinsic immunity: a front-line defense against viral attack. *Nat. Immunol.* 5, 1109–1115.
- Brandariz-Núñez, A., Roa, A., Valle-Casuso, J.C., Biris, N., Ivanov, D., and Diaz-Griffero, F. (2013). Contribution of SUMO-interacting motifs and SUMOylation to the antiretroviral properties of TRIM5 $\alpha$ . *Virology* 435, 463–471.
- Brennan, G., Kozyrev, Y., and Hu, S.L. (2008). TRIMCyp expression in Old World primates *Macaca nemestrina* and *Macaca fascicularis*. *Proc. Natl. Acad. Sci. USA* 105, 3569–3574.
- Carthagena, L., Parise, M.C., Ringeard, M., Chelbi-Alix, M.K., Hazan, U., and Nisole, S. (2008). Implication of TRIM alpha and TRIMCyp in interferon-induced anti-retroviral restriction activities. *Retrovirology* 5, 59.
- Cerboni, S., Gentili, M., and Manel, N. (2013). Diversity of pathogen sensors in dendritic cells. *Adv. Immunol.* 120, 211–237.
- Chelbi-Alix, M.K., Pelicano, L., Quignon, F., Koken, M.H., Venturini, L., Stadler, M., Pavlovic, J., Degos, L., and de Thé, H. (1995). Induction of the PML protein by interferons in normal and APL cells. *Leukemia* 9, 2027–2033.
- Cioce, M., and Lamond, A.I. (2005). Cajal bodies: a long history of discovery. *Annu. Rev. Cell Dev. Biol.* 21, 105–131.
- Cowan, S., Hatzioannou, T., Cunningham, T., Muesing, M.A., Gottlinger, H.G., and Bieniasz, P.D. (2002). Cellular inhibitors with Fv1-like activity restrict human and simian immunodeficiency virus tropism. *Proc. Natl. Acad. Sci. USA* 99, 11914–11919.
- Diaz-Griffero, F., Gallo, D.E., Hope, T.J., and Sodroski, J. (2011). Trafficking of some old world primate TRIM5 $\alpha$  proteins through the nucleus. *Retrovirology* 8, 38.
- Dutrieux, J., Portilho, D.M., Arhel, N.J., Hazan, U., and Nisole, S. (2015). TRIM5 $\alpha$  is a SUMO substrate. *Retrovirology* 12, 28.
- Everett, R.D., Boutell, C., and Hale, B.G. (2013). Interplay between viruses and host sumoylation pathways. *Nat. Rev. Microbiol.* 11, 400–411.
- Fukuda, I., Ito, A., Hirai, G., Nishimura, S., Kawasaki, H., Saitoh, H., Kimura, K., Sodeoka, M., and Yoshida, M. (2009). Ginkgolic acid inhibits protein SUMOylation by blocking formation of the E1-SUMO intermediate. *Chem. Biol.* 16, 133–140.
- Gao, D., Wu, J., Wu, Y.T., Du, F., Aroh, C., Yan, N., Sun, L., and Chen, Z.J. (2013). Cyclic GMP-AMP synthase is an innate immune sensor of HIV and other retroviruses. *Science* 341, 903–906.
- Hatzioannou, T., Ambrose, Z., Chung, N.P., Piatak, M., Jr., Yuan, F., Trubey, C.M., Coalter, V., Kiser, R., Schneider, D., Smedley, J., et al. (2009). A macaque model of HIV-1 infection. *Proc. Natl. Acad. Sci. USA* 106, 4425–4429.
- Hecker, C.M., Rabiller, M., Haglund, K., Bayer, P., and Dikic, I. (2006). Specification of SUMO1- and SUMO2-interacting motifs. *J. Biol. Chem.* 281, 16117–16127.
- Laguet, N., Sobhian, B., Casartelli, N., Ringeard, M., Chable-Bessia, C., Ségéral, E., Yatim, A., Emiliani, S., Schwartz, O., and Benkirane, M. (2011). SAMHD1 is the dendritic- and myeloid-cell-specific HIV-1 restriction factor counteracted by Vpx. *Nature* 474, 654–657.
- Lahaye, X., Satoh, T., Gentili, M., Cerboni, S., Conrad, C., Hurbain, I., El Marjou, A., Lacabaratz, C., Lelièvre, J.D., and Manel, N. (2013). The capsids of HIV-1 and HIV-2 determine immune detection of the viral cDNA by the innate sensor cGAS in dendritic cells. *Immunity* 39, 1132–1142.
- Lee, K., and KewalRamani, V.N. (2004). In defense of the cell: TRIM5alpha interception of mammalian retroviruses. *Proc. Natl. Acad. Sci. USA* 101, 10496–10497.
- Li, X., Yeung, D.F., Fiegen, A.M., and Sodroski, J. (2011). Determinants of the higher order association of the restriction factor TRIM5alpha and other tripartite motif (TRIM) proteins. *J. Biol. Chem.* 286, 27959–27970.
- Liao, C.H., Kuang, Y.Q., Liu, H.L., Zheng, Y.T., and Su, B. (2007). A novel fusion gene, TRIM5-Cyclophilin A in the pig-tailed macaque determines its susceptibility to HIV-1 infection. *AIDS* 21 (Suppl 8), S19–S26.
- Luban, J. (2012). Innate immune sensing of HIV-1 by dendritic cells. *Cell Host Microbe* 12, 408–418.
- Lukic, Z., Goff, S.P., Campbell, E.M., and Arriagada, G. (2013). Role of SUMO-1 and SUMO interacting motifs in rhesus TRIM5 $\alpha$ -mediated restriction. *Retrovirology* 10, 10.
- Machyna, M., Heyn, P., and Neugebauer, K.M. (2013). Cajal bodies: where form meets function. *Wiley Interdiscip. Rev. RNA* 4, 17–34.
- Melchjorsen, J. (2013). Learning from the messengers: innate sensing of viruses and cytokine regulation of immunity - clues for treatments and vaccines. *Viruses* 5, 470–527.
- Minty, A., Dumont, X., Kaghad, M., and Caput, D. (2000). Covalent modification of p73alpha by SUMO-1. Two-hybrid screening with p73 identifies novel SUMO-1-interacting proteins and a SUMO-1 interaction motif. *J. Biol. Chem.* 275, 36316–36323.
- Morris, G.E. (2008). The Cajal body. *Biochim. Biophys. Acta* 1783, 2108–2115.
- Müller, S., Matunis, M.J., and Dejean, A. (1998). Conjugation with the ubiquitin-related modifier SUMO-1 regulates the partitioning of PML within the nucleus. *EMBO J.* 17, 61–70.
- Münk, C., Brandt, S.M., Lucero, G., and Landau, N.R. (2002). A dominant block to HIV-1 replication at reverse transcription in simian cells. *Proc. Natl. Acad. Sci. USA* 99, 13843–13848.
- Nepveu-Traversy, M.E., and Berthou, L. (2014). The conserved sumoylation consensus site in TRIM5 $\alpha$  modulates its immune activation functions. *Virus Res.* 184, 30–38.
- Nepveu-Traversy, M.E., Bérubé, J., and Berthou, L. (2009). TRIM5alpha and TRIMCyp form apparent hexamers and their multimeric state is not affected by exposure to restriction-sensitive viruses or by treatment with pharmacological inhibitors. *Retrovirology* 6, 100.
- Newman, R.M., Hall, L., Kirmaier, A., Pozzi, L.A., Pery, E., Farzan, M., O’Neil, S.P., and Johnson, W. (2008). Evolution of a TRIM5-CypA splice isoform in old world monkeys. *PLoS Pathog.* 4, e1000003.
- Papkalla, A., Münch, J., Otto, C., and Kirchhoff, F. (2002). Nef enhances human immunodeficiency virus type 1 infectivity and replication independently of viral coreceptor tropism. *J. Virol.* 76, 8455–8459.
- Pertel, T., Hausmann, S., Morger, D., Züger, S., Guerra, J., Lascano, J., Reinhard, C., Santoni, F.A., Uchil, P.D., Chatel, L., et al. (2011). TRIM5 is an innate immune sensor for the retrovirus capsid lattice. *Nature* 472, 361–365.
- Rasaiyaah, J., Tan, C.P., Fletcher, A.J., Price, A.J., Blondeau, C., Hilditch, L., Jacques, D.A., Selwood, D.L., James, L.C., Noursadeghi, M., and Towers, G.J. (2013). HIV-1 evades innate immune recognition through specific cofactor recruitment. *Nature* 503, 402–405.
- Sakuma, R., Mael, A.A., and Ikeda, Y. (2007). Alpha interferon enhances TRIM5alpha-mediated antiviral activities in human and rhesus monkey cells. *J. Virol.* 81, 10201–10206.
- Sampson, D.A., Wang, M., and Matunis, M.J. (2001). The small ubiquitin-like modifier-1 (SUMO-1) consensus sequence mediates Ubc9 binding and is essential for SUMO-1 modification. *J. Biol. Chem.* 276, 21664–21669.
- Sastri, J., and Campbell, E.M. (2011). Recent insights into the mechanism and consequences of TRIM5 $\alpha$  retroviral restriction. *AIDS Res. Hum. Retroviruses* 27, 231–238.
- Schulz, S., Chachami, G., Kozackiewicz, L., Winter, U., Stankovic-Valentin, N., Haas, P., Hofmann, K., Urlaub, H., Ovaa, H., Wittbrodt, J., et al. (2012). Ubiquitin-specific protease-like 1 (USPL1) is a SUMO isopeptidase with essential, non-catalytic functions. *EMBO Rep.* 13, 930–938.
- Silvin, A., and Manel, N. (2015). Innate immune sensing of HIV infection. *Curr. Opin. Immunol.* 32, 54–60.
- Soll, S.J., Wilson, S.J., Kutluay, S.B., Hatzioannou, T., and Bieniasz, P.D. (2013). Assisted evolution enables HIV-1 to overcome a high TRIM5 $\alpha$ -imposed genetic barrier to rhesus macaque tropism. *PLoS Pathog.* 9, e1003667.
- Song, B., Javanbakht, H., Perron, M., Park, D.H., Stremlau, M., and Sodroski, J. (2005). Retrovirus restriction by TRIM5alpha variants from Old World and New World primates. *J. Virol.* 79, 3930–3937.

- Stremlau, M., Owens, C.M., Perron, M.J., Kiessling, M., Autissier, P., and Sodroski, J. (2004). The cytoplasmic body component TRIM5alpha restricts HIV-1 infection in Old World monkeys. *Nature* **427**, 848–853.
- Stremlau, M., Perron, M., Lee, M., Li, Y., Song, B., Javanbakht, H., Diaz-Grifero, F., Anderson, D.J., Sundquist, W.I., and Sodroski, J. (2006). Specific recognition and accelerated uncoating of retroviral capsids by the TRIM5alpha restriction factor. *Proc. Natl. Acad. Sci. USA* **103**, 5514–5519.
- Uchil, P.D., Hinz, A., Siegel, S., Coenen-Stass, A., Pertel, T., Luban, J., and Mothes, W. (2013). TRIM protein-mediated regulation of inflammatory and innate immune signaling and its association with antiretroviral activity. *J. Virol.* **87**, 257–272.
- Uzé, G., Di Marco, S., Mouchel-Vielh, E., Monneron, D., Bandu, M.T., Hori-berger, M.A., Dorques, A., Lutfalla, G., and Mogensen, K.E. (1994). Domains of interaction between alpha interferon and its receptor components. *J. Mol. Biol.* **243**, 245–257.
- van Montfoort, N., Olganier, D., and Hiscott, J. (2014). Unmasking immune sensing of retroviruses: interplay between innate sensors and host effectors. *Cytokine Growth Factor Rev.* **25**, 657–668.
- Virgen, C.A., Kratovac, Z., Bieniasz, P.D., and Hatzioannou, T. (2008). Independent genesis of chimeric TRIM5-cyclophilin proteins in two primate species. *Proc. Natl. Acad. Sci. USA* **105**, 3563–3568.
- Yap, M.W., Nisole, S., Lynch, C., and Stoye, J.P. (2004). Trim5alpha protein restricts both HIV-1 and murine leukemia virus. *Proc. Natl. Acad. Sci. USA* **101**, 10786–10791.
- Yoh, S.M., Schneider, M., Seifried, J., Soonthornvacharin, S., Akleh, R.E., Olivier, K.C., De Jesus, P.D., Ruan, C., de Castro, E., Ruiz, P.A., et al. (2015). PQBP1 Is a Proximal Sensor of the cGAS-Dependent Innate Response to HIV-1. *Cell* **161**, 1293–1305.
- Yueh, A., Leung, J., Bhattacharyya, S., Perrone, L.A., de los Santos, K., Pu, S.Y., and Goff, S.P. (2006). Interaction of moloney murine leukemia virus capsid with Ubc9 and PIASy mediates SUMO-1 addition required early in infection. *J. Virol.* **80**, 342–352.
- Zhang, F., Perez-Caballero, D., Hatzioannou, T., and Bieniasz, P.D. (2008). No effect of endogenous TRIM5alpha on HIV-1 production. *Nat. Med.* **14**, 235–236, author reply 236–238.



Cell Reports

Supplemental Information

**Endogenous TRIM5 $\alpha$  Function Is Regulated  
by SUMOylation and Nuclear Sequestration  
for Efficient Innate Sensing in Dendritic Cells**

Débora M. Portilho, Juliette Fernandez, Mathieu Ringiard, Anthony K. Machado, Aude Boulay, Martha Mayer, Michaela Müller-Trutwin, Anne-Sophie Beignon, Frank Kirchhoff, Sébastien Nisole, and Nathalie J. Arhel

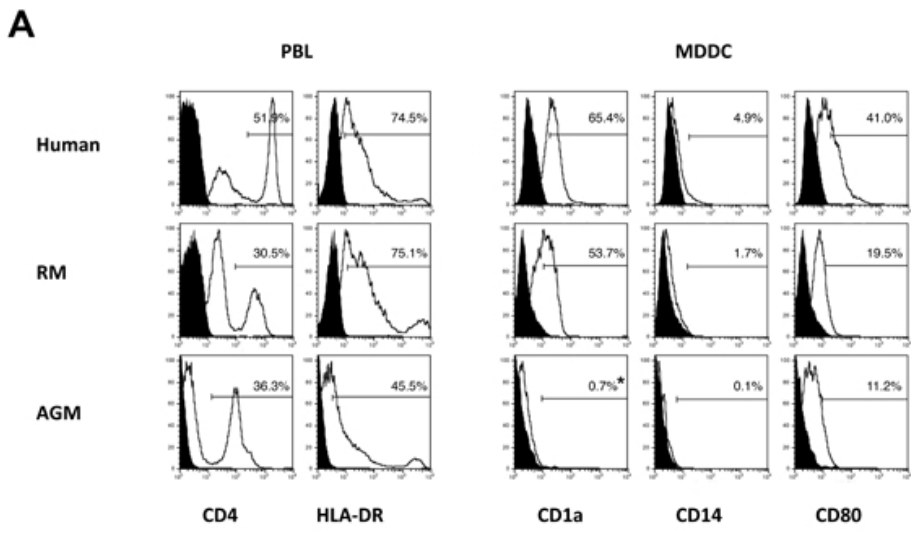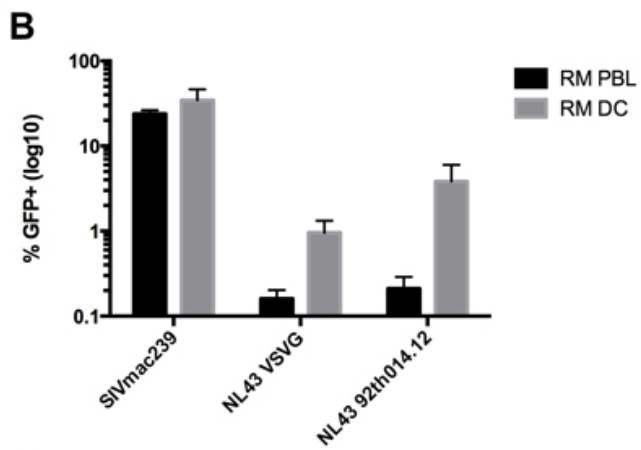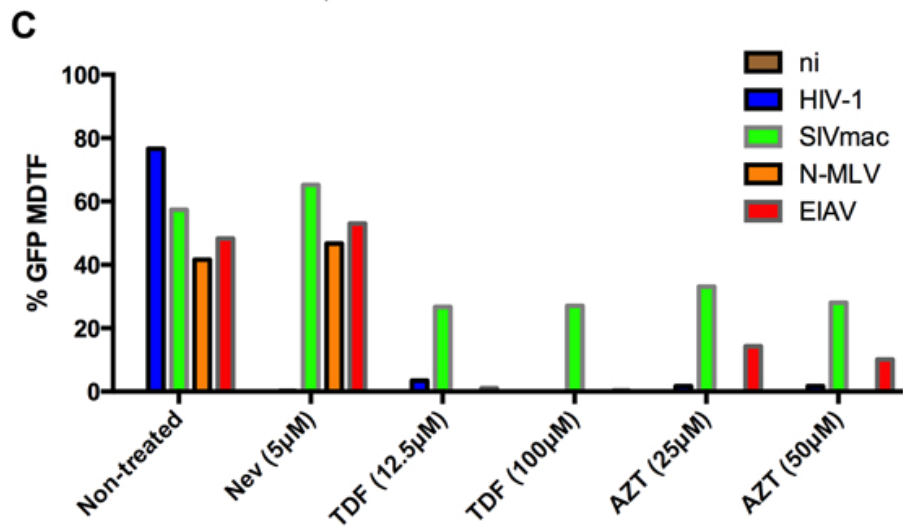

Fig. S1

**A**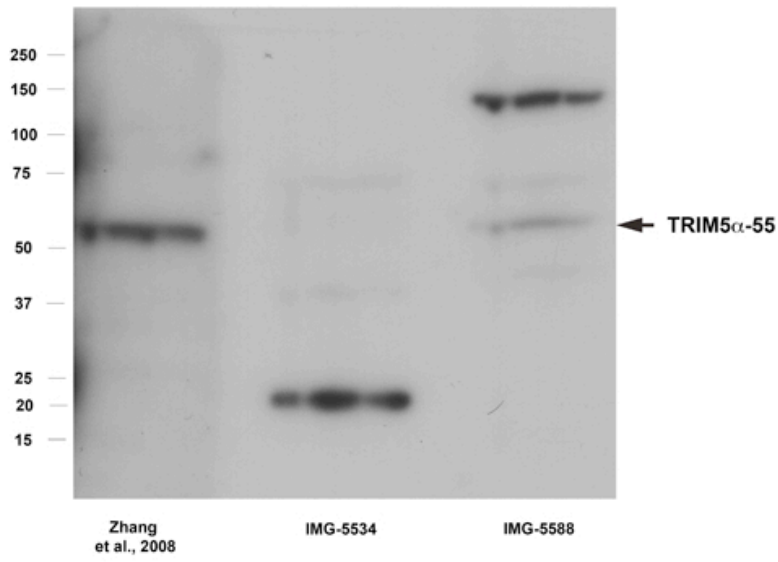**B**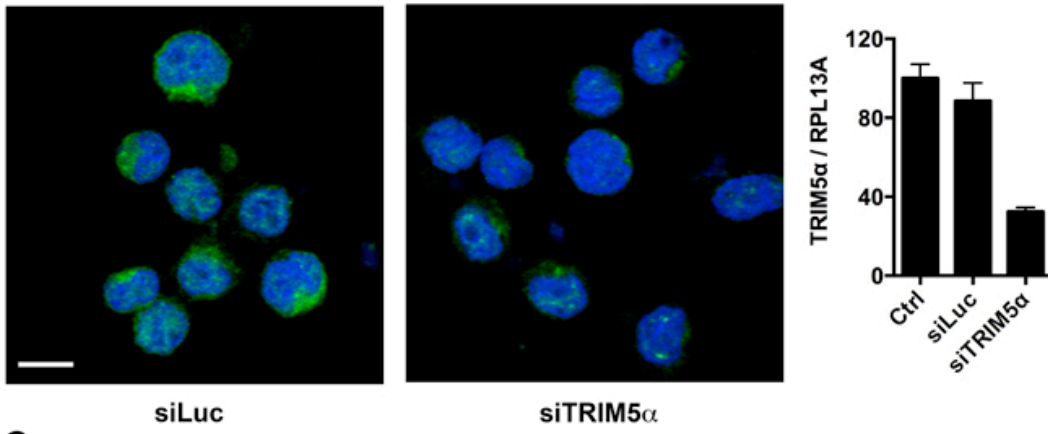**C**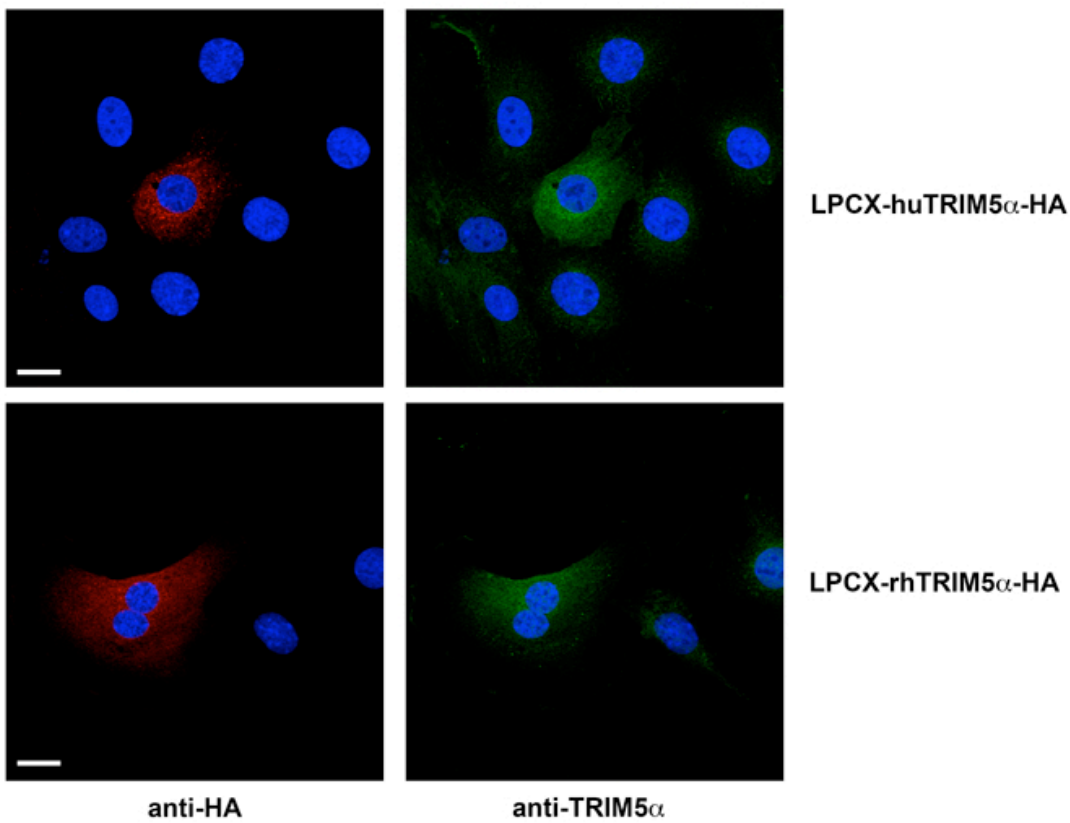

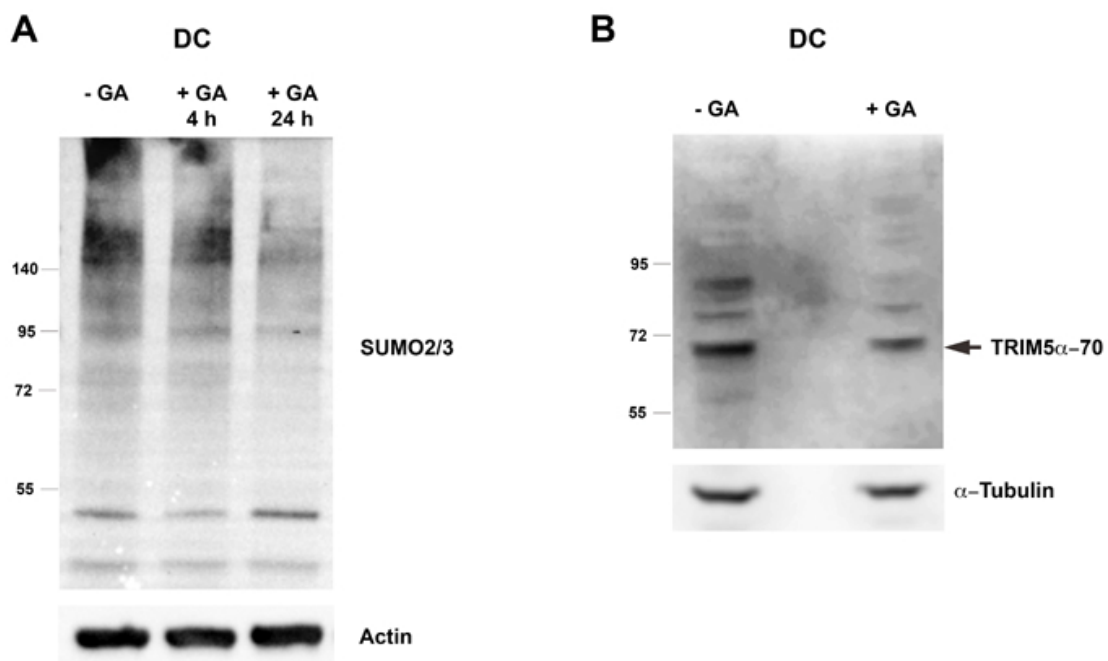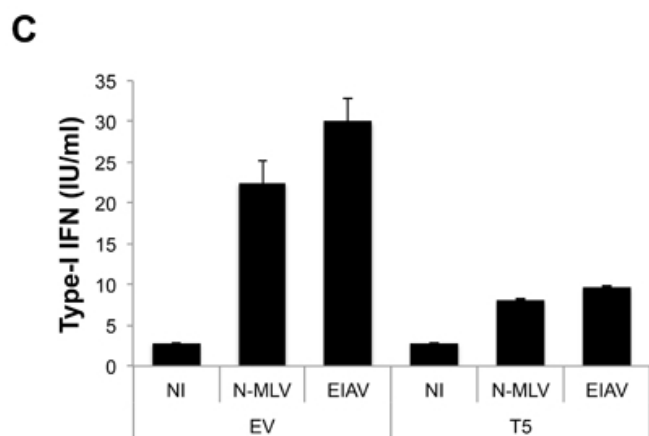

Fig. S3

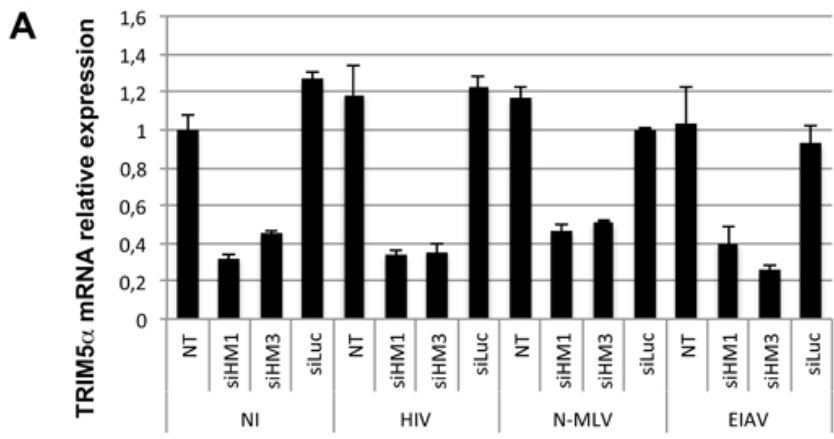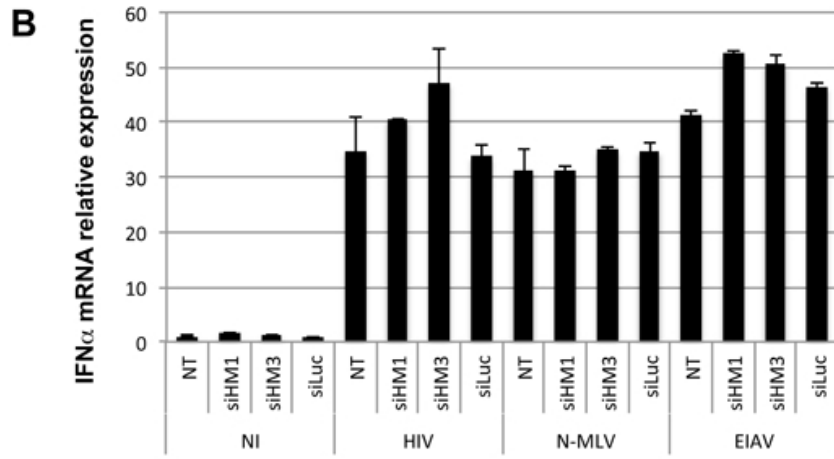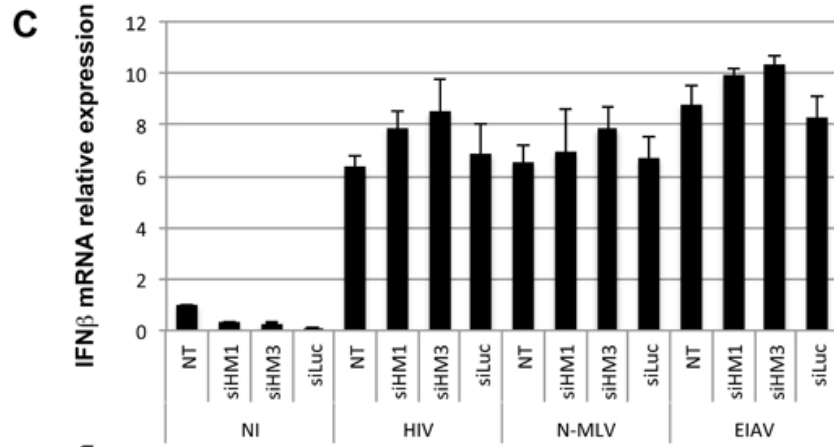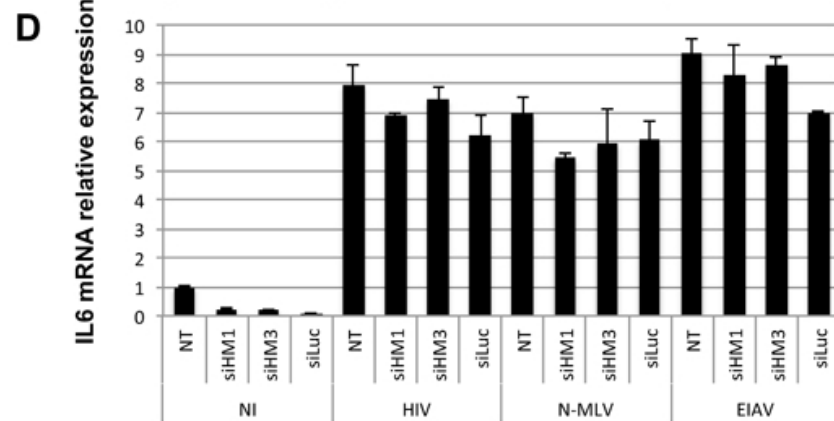

Fig. S4

## Supplemental Figure Legends

**Fig. S1 related to Fig. 1: Primary cell phenotypic characterisation, susceptibility to replicative virus, and sensitivity to reverse transcription inhibitors.** (A) Representative phenotypic marker characterisation of human, RM, and AGM PBL and DC. Cells were labelled with marker antibodies and analysed by flow cytometry using a BD FACSCalibur. HLA-DR labels activated PBL. Monocyte-derived DC are CD14–CD1a+. MHC class II HLA-DR and co-stimulatory molecule CD80 labelling indicate PBL activation and DC maturation, respectively. \* The CD1a antibody did not cross-react with AGM CD1a surface antigen, as previously shown (Mortara et al., 2006). (B) PBL and DC were isolated and activated/differentiated from rhesus macaque blood. Cells ( $3 \times 10^5$ ) were infected in 12-well plates with 100 ng of p24/p27 antigen of SIVmac239-IRES-eGFP, env-defective NL43-IRES-eGFP pseudotyped with VSV-G, or R5-tropic NL43-92th014.12 IRES-eGFP. Infectivity was assessed 3 dpi by flow cytometry. The graph shows triplicate values  $\pm$  SEM of a representative experiment. (C) Reverse transcription inhibitors were tested for efficiency against different retroviruses. MDTF cells, which lack TRIM5 $\alpha$ -mediated restriction, were transduced with the indicated retroviruses at MOI 1 in the presence of antiretroviral drugs. Transduction efficiency was measured at 3 dpt by flow cytometry detection of GFP.

**Fig. S2 related to Fig.2: Specificity of antibody-mediated detection of endogenous TRIM5 $\alpha$ .** (A) Human PBMC lysates were probed for endogenous TRIM5 $\alpha$  using a home-made rabbit polyclonal antibody raised against a C-terminal fragment of TRIM5 $\alpha$  (Zhang et al., 2008), comparing it with two commercial antibodies: polyclonal rabbit anti-TRIM5 $\alpha$  antibody (IMG-5534) and peptide-affinity purified polyclonal antibody to TRIM5 $\alpha$  (IN1; IMG-5588). Samples were run as triplicates on the same gel, and after transfer the membrane was cut in three to probe with each antibody separately. All three membranes were then developed simultaneously on the same radiograph. (B) Human PBL were lipofected with a siRNA against TRIM5 $\alpha$  (HM3) and labelled with the rabbit polyclonal anti-TRIM5 $\alpha$  antibody followed by anti-rabbit Alexa 488 at 24 h post-transfection. Knockdown efficiency was assessed in parallel by quantitative PCR. (C) MDTF cells were transduced with retroviral vector LPCX encoding human or RM TRIM5 $\alpha$ -HA and labelled with anti-HA and anti-TRIM5 $\alpha$  antibodies. Scale bars = 10  $\mu$ m.

**Fig. S3 related for Fig. 5: Effect of GA treatment on TRIM5 $\alpha$  SUMOylation, and quantification of produced type I IFN upon retroviral infection.** (A) Human DC were treated with GA for 4 and 24 h, or left untreated. Total cellular SUMOylation was assessed by probing for SUMO2/3. SUMOylated proteins appear as high molecular weight smear that disappears upon 24 h GA treatment. Actin was used to control for loading. (B) Human DC were treated with GA for 24 h or left untreated. Extracts were prepared in the presence of IAA. The lower Western blot shows  $\alpha$ -tubulin reactivity of the same samples. TRIM5 $\alpha$  labelling reveals high molecular weight bands that disappear upon GA treatment. (C) HL116 cells, which carry the luciferase gene under the control of the IFN-inducible 6–16 promoter (Uze et al., 1994), were incubated for 8 h with a standard containing titrated human IFN $\beta$  and the supernatants from DC transfected with pLPCX TRIM5 $\alpha$ -HA (T5) or empty pLPCX (EV), and either uninfected (NI) or infected with N-MLV or EIAV. Cells were then lysed and luciferase activity measured. IFN levels are expressed as equivalent of IFN $\beta$  concentration, in IU/ml. Results show the mean of quadruplicates from a representative experiment  $\pm$  SD.

**Fig. S4 related to Fig. 6: Assessment of TRIM5 $\alpha$  contribution to viral sensing by DC.** Human DC were DOTAP transfected with two different TRIM5 $\alpha$  specific siRNA (HM1 and HM3), siLuc, or left untransfected. After 48 h cells were transduced with HIV-1, N-MLV, or EIAV at MOI 5. RNA extracts were prepared at 24 hpi to quantify (A) TRIM5 $\alpha$ , (B) IFN $\alpha$ 1, (C) IFN $\beta$ , and (D) IL6. Copy numbers were normalised for housekeeping transcript RPL13A (60S ribosomal protein L13a).

## Supplemental Experimental Procedures

*Drugs.* Ginkgolic acid (GA), iodocetamide (IAA), leptomycin B (LMB), nevirapine (Nev) were obtained from Sigma and Tenofovir (TDF) from Alsachim. Interferon alpha was purchased from R&D Systems (Recombinant Human IFN $\alpha$ 2b).

*siRNA/shRNA.* siRNA directed against human (H) and rhesus macaque (M) TRIM5 $\alpha$ , HM1 (GCUCAGGGAGGUCAAGUUG), HM3 (GCACUGUCUCAUUCUCAA), and non-targeting siLuc control (GCCAUUCUAUCCUCUAGAGGAUG) siRNAs were purchased from Santa Cruz Biotechnology. shRNA against cGAS and LacZ were described previously (Lahaye et al., 2013).

*Antibodies.* Primary antibodies were rabbit polyclonal antibody raised against a C-terminal fragment of TRIM5 $\alpha$  (Zhang et al., 2008), mouse monoclonal anti-coilin (Pdelta, Abcam), anti-SUMO1 (21C7, Developmental Studies Hybridoma Bank), anti-PML (PG-M3, Santa Cruz Biotechnology), anti-GM-130 (35/GM130, BD Transduction Laboratories), anti-lamin A/C (636, Leica Biosystems), anti-beta-tubulin (TUB2.1, Sigma), anti- $\beta$ -actin (AC-74, Sigma) rat monoclonal anti-HA (3F10, Roche), and rabbit polyclonal anti-SUMO2/3 (Invitrogen). Conjugated antibodies were HLA-DR-PE, CD4-APC, CD14-FITC, and CD1a-PE from BD Biosciences, CD80-PE from Caltag and HRP-conjugated antibodies from GE Healthcare. Secondary antibodies were anti-rabbit Alexa 488 and anti-mouse Alexa 647 (Invitrogen).

*Quantitative RT-PCR.* Total RNAs were extracted using RNeasy Mini Kit (Qiagen) and cDNAs prepared using RevertAid H Minus First Strand cDNA Synthesis Kit (Thermo Scientific). Real-time PCR reactions were performed in duplicate using Takyon ROX SYBR Mastermix dTTP blue (Eurogentec) following manufacturer's instructions. Real-time PCR reactions were performed on a 7900HT Fast Real-Time PCR System (Applied Biosystems). Transcripts were quantified using the following program: 3 min at 95°C followed by forty cycles of 15 s at 95°C, 20 s at 60°C and 20 s at 72°C. RPL13A (ribosomal protein L13A) and beta-2-microglobulin ( $\beta$ 2M) were used as housekeeping genes to normalize mRNA expression. The ratio of gene of interest versus housekeeping gene was calculated using the  $2^{-\Delta\Delta C_t}$  method. Primers used for quantification of transcripts are as follows: RPL13A-F: CCTGGAGGAGAAGAGGAAAGAGA, RPL13A-R: TTGAGGACCTCTGTGTATTTGTCAA,  $\beta$ 2M-F: TGCTGTCTCCATGTTTGATGTATCT,  $\beta$ 2M-R: TCTCTGCTCCCCACCTCTAAGT, SUMO1-F: TCAAAGACAGGGTGTTCCTCAA, SUMO1-R: CCCCCTTTGTTTCTGATAAA, Ubc9-F: GGACCTGTGGCTGGAGAGGGAC, Ubc9-R: TTCCTCTCTGGGCGAGTCTGC, IFN $\alpha$ 1/13-F: CCAGTTCCAGAAGGCTCCAG, IFN $\alpha$ 1/13-R: TCCTCCTGCATCACACAGGC (Primers amplify both IFN $\alpha$ 1 and IFN $\alpha$ 13 transcripts), IL6-F: TAACCACCCCTGACCCAACC and IL6-R: ATTTGCCGAAGAGCCCTCAG. Primers for DNA quantification are the following: GAPDH-F: TGCACCACCAACTGCTTAGC, GAPDH-R: GGCATGGACTGTGGTCATGAG, eGFP/eYFP-F: TAAACGGCCACAAGTTCAGCG, eGFP/eYFP-R: TGGTGCAGATGAACTTCAGGG.

*IFN quantification.* IFN secretion was quantified using the reporter cell line HL116 that carries the luciferase gene under the control of the IFN-inducible 6–16 promoter (Uze et al., 1994). HL116 cells ( $2 \times 10^4$ ) were plated in 96-well plates and incubated for 8 h with the DC culture supernatants or a standard of human IFN $\beta$  reference (Gb-23-902-531). Cells were then lysed (Luciferase Cell Culture Lysis Reagent, Promega) and luciferase activity measured using a luminometer. IFN titers are expressed in international unit/ml relative to the human IFN $\beta$  reference (Gb-23-902-531) of the NIH.

### Supplemental References

Lahaye, X., Satoh, T., Gentili, M., Cerboni, S., Conrad, C., Hurbain, I., El Marjou, A., Lacabaratz, C., Lelievre, J.D., and Manel, N. (2013). The capsids of HIV-1 and HIV-2 determine immune detection of the viral cDNA by the innate sensor cGAS in dendritic cells. *Immunity* 39, 1132-1142.

Mortara, L., Ploquin, M.J., Faye, A., Scott-Algara, D., Vaslin, B., Butor, C., Hosmalin, A., Barre-Sinoussi, F., Diop, O.M., and Muller-Trutwin, M.C. (2006). Phenotype and function of myeloid dendritic cells derived from African green monkey blood monocytes. *J Immunol Methods* 308, 138-155.

Uze, G., Di Marco, S., Mouchel-Vielh, E., Monneron, D., Bandu, M.T., Horisberger, M.A., Dorques, A., Lutfalla, G., and Mogensen, K.E. (1994). Domains of interaction between alpha interferon and its receptor components. *J Mol Biol* 243, 245-257.

Zhang, F., Perez-Caballero, D., Hatzioannou, T., and Bieniasz, P.D. (2008). No effect of endogenous TRIM5alpha on HIV-1 production. *Nat Med* 14, 235-236; author reply 236-238.
